# Supplementary material for: A Network Meta-Analysis and GRADE Assessment of the Effect of Preoperative Oral Antibiotics with and Without Mechanical Bowel Preparation on Surgical Site Infection Rate in Colorectal Surgery
Source: PubMed Central journal article supplement — Ann Surg Open. 2022 Jun 23;3(3):e175. doi: 10.1097/AS9.0000000000000175 (PMC10431570; doi:10.1097/as9.0000000000000175), 2022-06-23
Supplement: as9-3-e175-s001.pdf [file as9-3-e175-s001.pdf]

## Appendix 1. Search strategy

Embase  
10-08-2021

| No. | Query                                                                                                                                                                                                                                                                                                                                                                                                                                                                                                                                                                                                                                                                                                                                                                                                                                                                                                                                                                                                                                                                                                                                                                                                                                                                                                                                                                             | Results |
|-----|-----------------------------------------------------------------------------------------------------------------------------------------------------------------------------------------------------------------------------------------------------------------------------------------------------------------------------------------------------------------------------------------------------------------------------------------------------------------------------------------------------------------------------------------------------------------------------------------------------------------------------------------------------------------------------------------------------------------------------------------------------------------------------------------------------------------------------------------------------------------------------------------------------------------------------------------------------------------------------------------------------------------------------------------------------------------------------------------------------------------------------------------------------------------------------------------------------------------------------------------------------------------------------------------------------------------------------------------------------------------------------------|---------|
| #30 | #29 NOT #28 = RCT                                                                                                                                                                                                                                                                                                                                                                                                                                                                                                                                                                                                                                                                                                                                                                                                                                                                                                                                                                                                                                                                                                                                                                                                                                                                                                                                                                 | 1532    |
| #29 | #16 AND #27                                                                                                                                                                                                                                                                                                                                                                                                                                                                                                                                                                                                                                                                                                                                                                                                                                                                                                                                                                                                                                                                                                                                                                                                                                                                                                                                                                       | 1697    |
| #28 | #15 AND #27 = SR                                                                                                                                                                                                                                                                                                                                                                                                                                                                                                                                                                                                                                                                                                                                                                                                                                                                                                                                                                                                                                                                                                                                                                                                                                                                                                                                                                  | 280     |
| #27 | (#24 OR #25) NOT #18 NOT #19                                                                                                                                                                                                                                                                                                                                                                                                                                                                                                                                                                                                                                                                                                                                                                                                                                                                                                                                                                                                                                                                                                                                                                                                                                                                                                                                                      | 1812    |
| #26 | #25 NOT #18 NOT #19                                                                                                                                                                                                                                                                                                                                                                                                                                                                                                                                                                                                                                                                                                                                                                                                                                                                                                                                                                                                                                                                                                                                                                                                                                                                                                                                                               | 1697    |
| #25 | #16 AND #23                                                                                                                                                                                                                                                                                                                                                                                                                                                                                                                                                                                                                                                                                                                                                                                                                                                                                                                                                                                                                                                                                                                                                                                                                                                                                                                                                                       | 2283    |
| #24 | #15 AND #23                                                                                                                                                                                                                                                                                                                                                                                                                                                                                                                                                                                                                                                                                                                                                                                                                                                                                                                                                                                                                                                                                                                                                                                                                                                                                                                                                                       | 404     |
| #23 | #22 NOT ('conference abstract'/it OR 'editorial'/it OR 'letter'/it OR 'note'/it) NOT (('animal experiment'/exp OR 'animal model'/exp OR 'nonhuman'/exp) NOT 'human'/exp)                                                                                                                                                                                                                                                                                                                                                                                                                                                                                                                                                                                                                                                                                                                                                                                                                                                                                                                                                                                                                                                                                                                                                                                                          | 6356    |
| #22 | #5 OR #21                                                                                                                                                                                                                                                                                                                                                                                                                                                                                                                                                                                                                                                                                                                                                                                                                                                                                                                                                                                                                                                                                                                                                                                                                                                                                                                                                                         | 11334   |
| #21 | #6 AND #7 AND #8                                                                                                                                                                                                                                                                                                                                                                                                                                                                                                                                                                                                                                                                                                                                                                                                                                                                                                                                                                                                                                                                                                                                                                                                                                                                                                                                                                  | 1093    |
| #20 | #19 NOT #18                                                                                                                                                                                                                                                                                                                                                                                                                                                                                                                                                                                                                                                                                                                                                                                                                                                                                                                                                                                                                                                                                                                                                                                                                                                                                                                                                                       | 510     |
| #19 | #16 AND #17                                                                                                                                                                                                                                                                                                                                                                                                                                                                                                                                                                                                                                                                                                                                                                                                                                                                                                                                                                                                                                                                                                                                                                                                                                                                                                                                                                       | 585     |
| #18 | #15 AND #17                                                                                                                                                                                                                                                                                                                                                                                                                                                                                                                                                                                                                                                                                                                                                                                                                                                                                                                                                                                                                                                                                                                                                                                                                                                                                                                                                                       | 124     |
| #17 | #12 NOT ('conference abstract'/it OR 'editorial'/it OR 'letter'/it OR 'note'/it) NOT (('animal experiment'/exp OR 'animal model'/exp OR 'nonhuman'/exp) NOT 'human'/exp)                                                                                                                                                                                                                                                                                                                                                                                                                                                                                                                                                                                                                                                                                                                                                                                                                                                                                                                                                                                                                                                                                                                                                                                                          | 1807    |
| #16 | ('clinical trial'/exp OR 'randomization'/exp OR 'single blind procedure'/exp OR 'double blind procedure'/exp OR 'crossover procedure'/exp OR 'placebo'/exp OR 'prospective study'/exp OR rct:ab,ti OR random*:ab,ti OR 'single blind':ab,ti OR 'randomised controlled trial':ab,ti OR 'randomized controlled trial'/exp OR placebo*:ab,ti) NOT 'conference abstract':it                                                                                                                                                                                                                                                                                                                                                                                                                                                                                                                                                                                                                                                                                                                                                                                                                                                                                                                                                                                                           | 2483988 |
| #15 | ('meta analysis'/exp OR 'meta analysis (topic)'/exp OR metaanaly*:ti,ab OR 'meta analy*':ti,ab OR metanaly*:ti,ab OR 'systematic review'/de OR 'cochrane database of systematic reviews'/jt OR prisma:ti,ab OR prospero:ti,ab OR (((systemati* OR scoping OR umbrella OR 'structured literature') NEAR/3 (review* OR overview*)):ti,ab) OR ((systemic* NEAR/1 review*):ti,ab) OR (((systemati* OR literature OR database* OR 'data base*') NEAR/10 search*):ti,ab) OR (((structured OR comprehensive* OR systemic*) NEAR/3 search*):ti,ab) OR (((literature NEAR/3 review*):ti,ab) AND (search*:ti,ab OR database*:ti,ab OR 'data base*':ti,ab)) OR (('data extraction':ti,ab OR 'data source*':ti,ab) AND 'study selection':ti,ab) OR ('search strategy':ti,ab AND 'selection criteria':ti,ab) OR ('data source*':ti,ab AND 'data synthesis':ti,ab) OR medline:ab OR pubmed:ab OR embase:ab OR cochrane:ab OR (((critical OR rapid) NEAR/2 (review* OR overview* OR synthes*)):ti) OR (((critical* OR rapid*) NEAR/3 (review* OR overview* OR synthes*)):ab) AND (search*:ab OR database*:ab OR 'data base*':ab)) OR metasynthes*:ti,ab OR 'meta synthes*':ti,ab) NOT (('animal'/exp OR 'animal experiment'/exp OR 'animal model'/exp OR 'nonhuman'/exp) NOT 'human'/exp) NOT ('conference abstract'/it OR 'conference review'/it OR 'editorial'/it OR 'letter'/it OR 'note'/it) | 526763  |

| No. | Query                                                                                                                                                                                                                                                                                                                                                                                                                    | Results |
|-----|--------------------------------------------------------------------------------------------------------------------------------------------------------------------------------------------------------------------------------------------------------------------------------------------------------------------------------------------------------------------------------------------------------------------------|---------|
| #14 | #4 AND #12                                                                                                                                                                                                                                                                                                                                                                                                               | 5       |
| #13 | #4 AND #11                                                                                                                                                                                                                                                                                                                                                                                                               | 0       |
| #12 | #9 OR #11                                                                                                                                                                                                                                                                                                                                                                                                                | 2338    |
| #11 | #8 AND #10                                                                                                                                                                                                                                                                                                                                                                                                               | 1092    |
| #10 | #6 AND #7                                                                                                                                                                                                                                                                                                                                                                                                                | 58072   |
| #9  | #5 AND #7                                                                                                                                                                                                                                                                                                                                                                                                                | 1345    |
| #8  | 'preoperative period'/exp OR preoperat* OR 'intestine surgery'/exp OR (((bowel OR colon* OR intestin* OR digestive OR colorectal) NEAR/1 surger*):ti,ab,kw)                                                                                                                                                                                                                                                              | 830551  |
| #7  | 'antibiotic agent'/exp OR 'antibiotic prophylaxis'/exp OR 'antibiotic*':ti,ab,kw OR 'selective decontamination of the digestive tract'/exp OR ((decontamination NEAR/3 (bowel OR digestive OR colon* OR intestin* OR colorectal)):ti,ab,kw)                                                                                                                                                                              | 1719555 |
| #6  | 'oral drug administration'/exp OR ((oral NEAR/2 administration):ti,ab,kw)                                                                                                                                                                                                                                                                                                                                                | 459280  |
| #5  | 'mechanical bowel preparation'/exp OR 'intestine preparation'/de OR ('digestive system'/exp AND 'decontamination'/exp) OR (((bowel OR colon* OR intestin* OR digestive OR colorectal) NEAR/1 preparation):ti,ab,kw) OR (('preoperative period'/exp OR preoperat*) AND ('laxative'/exp OR laxat*) AND ('intestine surgery'/exp OR (((bowel OR colon* OR intestin* OR digestive OR colorectal) NEAR/1 surger*):ti,ab,kw))) | 10301   |
| #4  | #1 OR #2 OR #3                                                                                                                                                                                                                                                                                                                                                                                                           | 5       |
| #3  | clinical AND trial AND selective AND decontamination AND of AND the AND digestive AND tract AND in AND elective AND colorectal AND cancer AND surgery AND abis AND 2019                                                                                                                                                                                                                                                  | 2       |
| #2  | mechanical AND oral AND antibiotic AND versus AND no AND bowel AND preparation AND for AND elective AND colectomy AND koskenvuo                                                                                                                                                                                                                                                                                          | 1       |
| #1  | 'meta analysis' AND of AND oral AND antibiotics AND mcsorley AND 2018                                                                                                                                                                                                                                                                                                                                                    | 2       |

#### 10-08-2021

| No. | Query                                                                                                                                                                                 | Results |
|-----|---------------------------------------------------------------------------------------------------------------------------------------------------------------------------------------|---------|
| #22 | #4 AND #21 = key articles                                                                                                                                                             | 4       |
| #21 | #18 OR #19 OR #20                                                                                                                                                                     | 633     |
| #20 | #19 NOT #18 = RCT                                                                                                                                                                     | 509     |
| #19 | #16 AND #17                                                                                                                                                                           | 585     |
| #18 | #15 AND #17 = SR                                                                                                                                                                      | 124     |
| #17 | #12 NOT ('conference abstract'/it OR 'editorial'/it OR 'letter'/it OR 'note'/it) NOT (('animal experiment'/exp OR 'animal model'/exp OR 'nonhuman'/exp) NOT 'human'/exp)              | 1806    |
| #16 | ('clinical trial'/exp OR 'randomization'/exp OR 'single blind procedure'/exp OR 'double blind procedure'/exp OR 'crossover procedure'/exp OR 'placebo'/exp OR 'prospective study'/exp | 2483988 |

| No. | Query                                                                                                                                                                                                                                                                                                                                                                                                                                                                                                                                                                                                                                                                                                                                                                                                                                                                                                                                                                                                                                                                                                                                                                                                                                                                                                                                                                            | Results |
|-----|----------------------------------------------------------------------------------------------------------------------------------------------------------------------------------------------------------------------------------------------------------------------------------------------------------------------------------------------------------------------------------------------------------------------------------------------------------------------------------------------------------------------------------------------------------------------------------------------------------------------------------------------------------------------------------------------------------------------------------------------------------------------------------------------------------------------------------------------------------------------------------------------------------------------------------------------------------------------------------------------------------------------------------------------------------------------------------------------------------------------------------------------------------------------------------------------------------------------------------------------------------------------------------------------------------------------------------------------------------------------------------|---------|
|     | OR rct:ab,ti OR random*:ab,ti OR 'single blind':ab,ti OR 'randomised controlled trial':ab,ti OR 'randomized controlled trial'/exp OR placebo*:ab,ti) NOT 'conference abstract':it                                                                                                                                                                                                                                                                                                                                                                                                                                                                                                                                                                                                                                                                                                                                                                                                                                                                                                                                                                                                                                                                                                                                                                                                |         |
| #15 | ('meta analysis'/exp OR 'meta analysis (topic)'/exp OR metaanaly*:ti,ab OR 'meta analy*:ti,ab OR metanaly*:ti,ab OR 'systematic review'/de OR 'cochrane database of systematic reviews'/jt OR prisma:ti,ab OR prospero:ti,ab OR (((systemati* OR scoping OR umbrella OR 'structured literature') NEAR/3 (review* OR overview*)):ti,ab) OR ((systemic* NEAR/1 review*):ti,ab) OR (((systemati* OR literature OR database* OR 'data base*') NEAR/10 search*):ti,ab) OR (((structured OR comprehensive* OR systemic*) NEAR/3 search*):ti,ab) OR (((literature NEAR/3 review*):ti,ab) AND (search*:ti,ab OR database*:ti,ab OR 'data base*':ti,ab)) OR (('data extraction':ti,ab OR 'data source*':ti,ab) AND 'study selection':ti,ab) OR ('search strategy':ti,ab AND 'selection criteria':ti,ab) OR ('data source*':ti,ab AND 'data synthesis':ti,ab) OR medline:ab OR pubmed:ab OR embase:ab OR cochrane:ab OR (((critical OR rapid) NEAR/2 (review* OR overview* OR synthes*)):ti) OR (((critical* OR rapid*) NEAR/3 (review* OR overview* OR synthes*)):ab) AND (search*:ab OR database*:ab OR 'data base*':ab)) OR metasynthes*:ti,ab OR 'meta synthes*':ti,ab) NOT (('animal'/exp OR 'animal experiment'/exp OR 'animal model'/exp OR 'nonhuman'/exp) NOT 'human'/exp) NOT ('conference abstract'/it OR 'conference review'/it OR 'editorial'/it OR 'letter'/it OR 'note'/it) | 526763  |
| #14 | #4 AND #12                                                                                                                                                                                                                                                                                                                                                                                                                                                                                                                                                                                                                                                                                                                                                                                                                                                                                                                                                                                                                                                                                                                                                                                                                                                                                                                                                                       | 5       |
| #13 | #4 AND #11                                                                                                                                                                                                                                                                                                                                                                                                                                                                                                                                                                                                                                                                                                                                                                                                                                                                                                                                                                                                                                                                                                                                                                                                                                                                                                                                                                       | 0       |
| #12 | #9 OR #11                                                                                                                                                                                                                                                                                                                                                                                                                                                                                                                                                                                                                                                                                                                                                                                                                                                                                                                                                                                                                                                                                                                                                                                                                                                                                                                                                                        | 2338    |
| #11 | #8 AND #10                                                                                                                                                                                                                                                                                                                                                                                                                                                                                                                                                                                                                                                                                                                                                                                                                                                                                                                                                                                                                                                                                                                                                                                                                                                                                                                                                                       | 1092    |
| #10 | #6 AND #7                                                                                                                                                                                                                                                                                                                                                                                                                                                                                                                                                                                                                                                                                                                                                                                                                                                                                                                                                                                                                                                                                                                                                                                                                                                                                                                                                                        | 58072   |
| #9  | #5 AND #7                                                                                                                                                                                                                                                                                                                                                                                                                                                                                                                                                                                                                                                                                                                                                                                                                                                                                                                                                                                                                                                                                                                                                                                                                                                                                                                                                                        | 1345    |
| #8  | 'preoperative period'/exp OR preoperat*:ti,ab,kw OR 'intestine surgery'/exp OR (((bowel OR colon* OR intestin* OR digestive OR colorectal) NEAR/1 surger*):ti,ab,kw)                                                                                                                                                                                                                                                                                                                                                                                                                                                                                                                                                                                                                                                                                                                                                                                                                                                                                                                                                                                                                                                                                                                                                                                                             | 829812  |
| #7  | 'antibiotic agent'/exp OR 'antibiotic prophylaxis'/exp OR 'antibiotic*':ti,ab,kw OR 'selective decontamination of the digestive tract'/exp OR ((decontamination NEAR/3 (bowel OR digestive OR colon* OR intestin* OR colorectal)):ti,ab,kw)                                                                                                                                                                                                                                                                                                                                                                                                                                                                                                                                                                                                                                                                                                                                                                                                                                                                                                                                                                                                                                                                                                                                      | 1719555 |
| #6  | 'oral drug administration'/exp OR ((oral NEAR/2 administration):ti,ab,kw)                                                                                                                                                                                                                                                                                                                                                                                                                                                                                                                                                                                                                                                                                                                                                                                                                                                                                                                                                                                                                                                                                                                                                                                                                                                                                                        | 459280  |
| #5  | 'mechanical bowel preparation'/exp OR 'intestine preparation'/de OR ('digestive system'/exp AND 'decontamination'/exp) OR (((bowel OR colon* OR intestin* OR digestive OR colorectal) NEAR/1 preparation):ti,ab,kw) OR (('preoperative period'/exp OR preoperat*:ti,ab,kw) AND ('laxative'/exp OR laxat*:ti,ab,kw) AND ('intestine surgery'/exp OR (((bowel OR colon* OR intestin* OR digestive OR colorectal) NEAR/1 surger*):ti,ab,kw)))                                                                                                                                                                                                                                                                                                                                                                                                                                                                                                                                                                                                                                                                                                                                                                                                                                                                                                                                       | 10300   |
| #4  | #1 OR #2 OR #3                                                                                                                                                                                                                                                                                                                                                                                                                                                                                                                                                                                                                                                                                                                                                                                                                                                                                                                                                                                                                                                                                                                                                                                                                                                                                                                                                                   | 4       |
| #3  | clinical AND trial AND selective AND decontamination AND of AND the AND digestive AND tract AND in AND elective AND colorectal AND cancer AND surgery AND abis AND 2019                                                                                                                                                                                                                                                                                                                                                                                                                                                                                                                                                                                                                                                                                                                                                                                                                                                                                                                                                                                                                                                                                                                                                                                                          | 1       |
| #2  | mechanical AND oral AND antibiotic AND versus AND no AND bowel AND preparation AND for AND elective AND colectomy AND koskenvuo                                                                                                                                                                                                                                                                                                                                                                                                                                                                                                                                                                                                                                                                                                                                                                                                                                                                                                                                                                                                                                                                                                                                                                                                                                                  | 1       |

| No. | Query                                                                 | Results |
|-----|-----------------------------------------------------------------------|---------|
| #1  | 'meta analysis' AND of AND oral AND antibiotics AND mcsorley AND 2018 | 2       |

## Ovid/Medline

10-08-2021

| #  | Searches                                                                                                                                                                                                                                                                                                                                                                                                                                                                                                                                                                                                                                                                                                                                                                                                                                                                                                                                    | Results |
|----|---------------------------------------------------------------------------------------------------------------------------------------------------------------------------------------------------------------------------------------------------------------------------------------------------------------------------------------------------------------------------------------------------------------------------------------------------------------------------------------------------------------------------------------------------------------------------------------------------------------------------------------------------------------------------------------------------------------------------------------------------------------------------------------------------------------------------------------------------------------------------------------------------------------------------------------------|---------|
| 21 | from 19 keep 1-1071 = RCT                                                                                                                                                                                                                                                                                                                                                                                                                                                                                                                                                                                                                                                                                                                                                                                                                                                                                                                   | 1071    |
| 20 | from 17 keep 1-196 = SR                                                                                                                                                                                                                                                                                                                                                                                                                                                                                                                                                                                                                                                                                                                                                                                                                                                                                                                     | 196     |
| 19 | 18 not 17                                                                                                                                                                                                                                                                                                                                                                                                                                                                                                                                                                                                                                                                                                                                                                                                                                                                                                                                   | 1071    |
| 18 | 16 not 12                                                                                                                                                                                                                                                                                                                                                                                                                                                                                                                                                                                                                                                                                                                                                                                                                                                                                                                                   | 1199    |
| 17 | 15 not 11                                                                                                                                                                                                                                                                                                                                                                                                                                                                                                                                                                                                                                                                                                                                                                                                                                                                                                                                   | 196     |
| 16 | 9 and 14                                                                                                                                                                                                                                                                                                                                                                                                                                                                                                                                                                                                                                                                                                                                                                                                                                                                                                                                    | 1554    |
| 15 | 8 and 14                                                                                                                                                                                                                                                                                                                                                                                                                                                                                                                                                                                                                                                                                                                                                                                                                                                                                                                                    | 282     |
| 14 | 13 not ((exp animals/ or exp models, animal/) not humans/) not (letter/ or comment/ or editorial/)                                                                                                                                                                                                                                                                                                                                                                                                                                                                                                                                                                                                                                                                                                                                                                                                                                          | 4028    |
| 13 | 1 or 6                                                                                                                                                                                                                                                                                                                                                                                                                                                                                                                                                                                                                                                                                                                                                                                                                                                                                                                                      | 4597    |
| 12 | 9 and 10                                                                                                                                                                                                                                                                                                                                                                                                                                                                                                                                                                                                                                                                                                                                                                                                                                                                                                                                    | 355     |
| 11 | 8 and 10                                                                                                                                                                                                                                                                                                                                                                                                                                                                                                                                                                                                                                                                                                                                                                                                                                                                                                                                    | 86      |
| 10 | 7 not ((exp animals/ or exp models, animal/) not humans/) not (letter/ or comment/ or editorial/)                                                                                                                                                                                                                                                                                                                                                                                                                                                                                                                                                                                                                                                                                                                                                                                                                                           | 856     |
| 9  | (exp clinical trial/ or randomized controlled trial/ or exp clinical trials as topic/ or randomized controlled trials as topic/ or Random Allocation/ or Double-Blind Method/ or Single-Blind Method/ or (clinical trial, phase i or clinical trial, phase ii or clinical trial, phase iii or clinical trial, phase iv or controlled clinical trial or randomized controlled trial or multicenter study or clinical trial).pt. or random*.ti,ab. or (clinic* adj trial*).tw. or ((singl* or doubl* or treb* or tripl*) adj (blind\$3 or mask\$3)).tw. or Placebos/ or placebo*.tw.) not (animals/ not humans/)                                                                                                                                                                                                                                                                                                                              | 2055834 |
| 8  | (meta-analysis/ or meta-analysis as topic/ or metaanaly* or meta-analy* or metanaly*).ti,ab,kf. or systematic review/ or cochrane.jw. or (prisma or prospero).ti,ab,kf. or ((systemati* or scoping or umbrella or "structured literature") adj3 (review* or overview*)).ti,ab,kf. or (systemic* adj1 review*).ti,ab,kf. or ((systemati* or literature or database* or data-base*) adj10 search*).ti,ab,kf. or ((structured or comprehensive* or systemic*) adj3 search*).ti,ab,kf. or ((literature adj3 review*) and (search* or database* or data-base*)).ti,ab,kf. or (("data extraction" or "data source*") and "study selection").ti,ab,kf. or ("search strategy" and "selection criteria").ti,ab,kf. or ("data source*" and "data synthesis").ti,ab,kf. or (medline or pubmed or embase or cochrane).ab. or ((critical or rapid) adj2 (review* or overview* or synthes*)).ti. or (((critical* or rapid*) adj3 (review* or overview* or | 466230  |

|   |                                                                                                                                                                                                                                                                                                                                                                           |        |
|---|---------------------------------------------------------------------------------------------------------------------------------------------------------------------------------------------------------------------------------------------------------------------------------------------------------------------------------------------------------------------------|--------|
|   | synthes*)) and (search* or database* or data-base*).ab. or (metasynthes* or meta-synthes*).ti,ab,kf.)<br>not (comment/ or editorial/ or letter/ or ((exp animals/ or exp models, animal/) not humans/))                                                                                                                                                                   |        |
| 7 | 5 or 6                                                                                                                                                                                                                                                                                                                                                                    | 990    |
| 6 | 2 and 3 and 4                                                                                                                                                                                                                                                                                                                                                             | 268    |
| 5 | 1 and 3                                                                                                                                                                                                                                                                                                                                                                   | 806    |
| 4 | exp preoperative period/ or preoperat*.ti,ab,kf. or exp colorectal surgery/ or ((bowel or colon* or<br>intestin* or digestive or colorectal) adj1 surger*).ti,ab,kf.                                                                                                                                                                                                      | 315905 |
| 3 | exp anti-bacterial agents/ or exp antibiotic prophylaxis/ or antibiotic*.ti,ab,kf. or (decontamination<br>adj3 (bowel or digestive or colon* or intestin* or colorectal)).ti,ab,kf.                                                                                                                                                                                       | 897685 |
| 2 | exp administration, oral/ or (oral adj2 administration).ti,ab,kf.                                                                                                                                                                                                                                                                                                         | 191333 |
| 1 | (exp digestive system/ and exp decontamination/) or ((bowel or colon* or intestin* or digestive or<br>colorectal) adj1 preparation).ti,ab,kf. or ((exp perioperative period/ or preoperat*.ti,ab,kf.) and (exp<br>laxatives/ or laxat*.ti,ab,kf.) and (exp colorectal surgery/ or ((bowel or colon* or intestin* or digestive<br>or colorectal) adj1 surger*).ti,ab,kf.)) | 4413   |

10-08-2021

| #  | Searches                                                                                                                                                                                                                                                                                                                                                                                                                                                                                                                                                                                                                                                                                                                                             | Results |
|----|------------------------------------------------------------------------------------------------------------------------------------------------------------------------------------------------------------------------------------------------------------------------------------------------------------------------------------------------------------------------------------------------------------------------------------------------------------------------------------------------------------------------------------------------------------------------------------------------------------------------------------------------------------------------------------------------------------------------------------------------------|---------|
| 13 | 12 not 11 = RCT                                                                                                                                                                                                                                                                                                                                                                                                                                                                                                                                                                                                                                                                                                                                      | 291     |
| 12 | 9 and 10                                                                                                                                                                                                                                                                                                                                                                                                                                                                                                                                                                                                                                                                                                                                             | 355     |
| 11 | 8 and 10 = SR                                                                                                                                                                                                                                                                                                                                                                                                                                                                                                                                                                                                                                                                                                                                        | 86      |
| 10 | 7 not ((exp animals/ or exp models, animal/) not humans/) not (letter/ or comment/ or editorial/)                                                                                                                                                                                                                                                                                                                                                                                                                                                                                                                                                                                                                                                    | 856     |
| 9  | (exp clinical trial/ or randomized controlled trial/ or exp clinical trials as topic/ or randomized<br>controlled trials as topic/ or Random Allocation/ or Double-Blind Method/ or Single-Blind Method/ or<br>(clinical trial, phase i or clinical trial, phase ii or clinical trial, phase iii or clinical trial, phase iv or<br>controlled clinical trial or randomized controlled trial or multicenter study or clinical trial).pt. or<br>random*.ti,ab. or (clinic* adj trial*).tw. or ((singl* or doubl* or treb* or tripl*) adj (blind\$3 or<br>mask\$3)).tw. or Placebos/ or placebo*.tw.) not (animals/ not humans/)                                                                                                                        | 2052324 |
| 8  | (meta-analysis/ or meta-analysis as topic/ or metaanaly* or meta-analy* or metanaly*).ti,ab,kf. or<br>systematic review/ or cochrane.jw. or (prisma or prospero).ti,ab,kf. or ((systemati* or scoping or<br>umbrella or "structured literature") adj3 (review* or overview*).ti,ab,kf. or (systemic* adj1<br>review*).ti,ab,kf. or ((systemati* or literature or database* or data-base*) adj10 search*).ti,ab,kf. or<br>((structured or comprehensive* or systemic*) adj3 search*).ti,ab,kf. or ((literature adj3 review*) and<br>(search* or database* or data-base*).ti,ab,kf. or ("data extraction" or "data source") and "study<br>selection").ti,ab,kf. or ("search strategy" and "selection criteria").ti,ab,kf. or ("data source*" and "data | 464715  |

|   |                                                                                                                                                                                                                                                                                                                                                                                                            |        |
|---|------------------------------------------------------------------------------------------------------------------------------------------------------------------------------------------------------------------------------------------------------------------------------------------------------------------------------------------------------------------------------------------------------------|--------|
|   | synthesis").ti,ab,kf. or (medline or pubmed or embase or cochrane).ab. or ((critical or rapid) adj2 (review* or overview* or synthes*)).ti. or (((critical* or rapid*) adj3 (review* or overview* or synthes*)) and (search* or database* or data-base*)).ab. or (metasynthes* or meta-synthes*).ti,ab,kf.) not (comment/ or editorial/ or letter/ or ((exp animals/ or exp models, animal/) not humans/)) |        |
| 7 | 5 or 6                                                                                                                                                                                                                                                                                                                                                                                                     | 990    |
| 6 | 2 and 3 and 4                                                                                                                                                                                                                                                                                                                                                                                              | 267    |
| 5 | 1 and 3                                                                                                                                                                                                                                                                                                                                                                                                    | 806    |
| 4 | exp preoperative period/ or preoperat*.ti,ab,kf. or exp colorectal surgery/ or ((bowel or colon* or intestin* or digestive or colorectal) adj1 surger*).ti,ab,kf.                                                                                                                                                                                                                                          | 315324 |
| 3 | exp anti-bacterial agents/ or exp antibiotic prophylaxis/ or antibiotic*.ti,ab,kf. or (decontamination adj3 (bowel or digestive or colon* or intestin* or colorectal)).ti,ab,kf.                                                                                                                                                                                                                           | 896696 |
| 2 | exp administration, oral/ or (oral adj2 administration).ti,ab,kf.                                                                                                                                                                                                                                                                                                                                          | 191137 |
| 1 | ((exp digestive system/ and exp decontamination/) or ((bowel or colon* or intestin* or digestive or colorectal) adj1 preparation).ti,ab,kf. or ((exp perioperative period/ or preoperat*.ti,ab,kf.) and (exp laxatives/ or laxat*.ti,ab,kf.) and (exp colorectal surgery/ or ((bowel or colon* or intestin* or digestive or colorectal) adj1 surger*).ti,ab,kf.))                                          | 4404   |

## Appendix 2. Full text decisions

|     | <b>Author, Year</b>  | <b>Reason for exclusion</b>      |
|-----|----------------------|----------------------------------|
| 1.  | Apte 2020            | Study protocol                   |
| 2.  | Vadwana 2020         | No RCT                           |
| 3.  | Mulder 2018          | Study protocol                   |
| 4.  | Vignaud 2018         | Study protocol                   |
| 5.  | Hu 2018              | Language outside scope           |
| 6.  | Kobayashi 2015       | Language outside scope           |
| 7.  | Beerdawood 2014      | Emergency surgeries included     |
| 8.  | Collin 2014          | Irrelevant outcome or comparison |
| 9.  | Saha 2014            | Emergency surgeries included     |
| 10. | Dijksman 2012        | Irrelevant outcome or comparison |
| 11. | Kolovrat 2012        | No RCT                           |
| 12. | Scabini 2012         | Retracted                        |
| 13. | Van't Sant 2012      | Subanalysis of Contant 2007      |
| 14. | Khan 2011            | Not retrievable                  |
| 15. | Roig 2011            | No RCT                           |
| 16. | Van't Sant 2011      | Subanalysis of Contant 2007      |
| 17. | Scabini 2010         | Retracted                        |
| 18. | Van't Sant 2010      | Subanalysis of Contant 2007      |
| 19. | Gravante 2009        | Comment or letter                |
| 20. | Roos 2009            | No RCT                           |
| 21. | Alcantara Moral 2009 | Language outside scope           |
| 22. | Takesue 2009         | Poster presentation              |
| 23. | Leiro 2008           | Language outside scope           |
| 24. | Itani 2007           | Irrelevant outcome or comparison |
| 25. | Pena-Soria 2007      | Interim analysis Pena-Soria 2008 |
| 26. | Platell 2007         | Comment or letter                |
| 27. | Reddy 2007           | No preoperative iv SAP           |
| 28. | Verma 2007           | Not retrievable                  |
| 29. | Bucher 2006          | Irrelevant outcome or comparison |
| 30. | Bucher 2006          | Erratum                          |
| 31. | Fa-Si-Oen 2005       | Irrelevant outcome or comparison |
| 32. | Gray 2005            | No RCT                           |
| 33. | Van Geldere 2002     | No RCT                           |
| 34. | Young Tabusso 2002   | Language outside scope           |
| 35. | Fillmann 2001        | Not retrievable                  |
| 36. | Kale 1998            | Irrelevant outcome or comparison |
| 37. | Torres Panuncia 1998 | Not retrievable                  |
| 38. | Yabata 1997          | No preoperative iv SAP           |
| 39. | Fillman 1995         | Language outside scope           |
| 40. | Santos Jr 1994       | Children included                |
| 41. | Tan 1993             | Not retrievable                  |
| 42. | Brownson 1992        | Abstract only                    |
| 43. | Tsimoyiannis 1991    | Irrelevant outcome or comparison |
| 44. | Gardini 1990         | Language outside of scope        |
| 45. | Nohr 1990            | Not retrievable                  |
| 46. | Vacher 1990          | Language outside of scope        |
| 47. | Cann 1988            | Irrelevant outcome or comparison |
| 48. | Gruttadauria 1987    | Not retrievable                  |
| 49. | Peruzzo 1987         | Not retrievable                  |
| 50. | Gottrup 1985         | No preoperative iv SAP           |
| 51. | Sgarlato 1984        | Irrelevant outcome or comparison |

|                                           |                      |                                  |
|-------------------------------------------|----------------------|----------------------------------|
| <b>52.</b>                                | Hinchey 1983         | Irrelevant outcome or comparison |
| <b>53.</b>                                | May 1983             | No RCT                           |
| <b>54.</b>                                | Gerritsen 1982       | No preoperative iv SAP           |
| <b>55.</b>                                | Keighley 1982        | Irrelevant outcome or comparison |
| <b>56.</b>                                | Lazorthes 1982       | No preoperative iv SAP           |
| <b>57.</b>                                | Burdon 1981          | Not retrievable                  |
| <b>58.</b>                                | Goldring 1981        | Not retrievable                  |
| <b>59.</b>                                | Lewis 1981           | No preoperative iv SAP           |
| <b>60.</b>                                | Barber 1979          | Not retrievable                  |
| <b>61.</b>                                | Condon 1979          | No preoperative iv SAP           |
| <b>62.</b>                                | Molin 1979           | Not retrievable                  |
| <b>63.</b>                                | Montariol 1979       | Language outside scope           |
| <b>64.</b>                                | Wapnick 1979         | No preoperative iv SAP           |
| <b>65.</b>                                | Brogden 1978         | No RCT                           |
| <b>66.</b>                                | Gillespie 1978       | No preoperative iv SAP           |
| <b>67.</b>                                | Hojer 1978           | No preoperative iv SAP           |
| <b>68.</b>                                | Matheson 1978        | No preoperative iv SAP           |
| <b>69.</b>                                | Vargish 1978         | No preoperative iv SAP           |
| <b>70.</b>                                | Clarke 1977          | No preoperative iv SAP           |
| <b>71.</b>                                | Mendes da Costa 1977 | Not retrievable                  |
| <b>72.</b>                                | Nichols 1977         | Irrelevant outcome or comparison |
| <b>73.</b>                                | Semb 1977            | Abstract only                    |
| <b>74.</b>                                | Schneiders 1977      | No preoperative iv SAP           |
| <b>75.</b>                                | Wetterfors 1976      | No preoperative iv SAP           |
| <b>76.</b>                                | Goldring 1975        | No preoperative iv SAP           |
| <b>77.</b>                                | Nichols 1973         | No preoperative iv SAP           |
| <b>78.</b>                                | Barker 1971          | No preoperative iv SAP           |
| <b>79.</b>                                | Hulbert 1967         | No preoperative iv SAP           |
| *SAP = surgical antimicrobial prophylaxis |                      |                                  |



### Appendix 3. Study Characteristics

| MBP vs MBP-OA: 23 RCTs     |               |        |        |                                                                                                           |                     |                                                                                              |                                                                                                                                          |                                                                                |
|----------------------------|---------------|--------|--------|-----------------------------------------------------------------------------------------------------------|---------------------|----------------------------------------------------------------------------------------------|------------------------------------------------------------------------------------------------------------------------------------------|--------------------------------------------------------------------------------|
| Study                      | SSI*/ N total | N – T1 | N - T2 | Type of surgery                                                                                           | Open / laparoscopic | MBP regimen                                                                                  | OA regimen                                                                                                                               | Preoperative IV SAP and intraoperative redosing                                |
| Papp 2021 <sup>1</sup>     | 52 / 529      | 276    | 253    | Colorectal surgery with anastomosis (excl loop CC)                                                        | Mixed               | 40ml castor oil + 20ml paraffin day before surgery + enema day before and morning of surgery | Metronidazole 500mg + neomycin sulphate 1g day before surgery (13h, 15h, 19h)                                                            | Ceftriaxone 2g + metronidazole 500mg, Redose > 4hrs and/or blood loss > 1500ml |
| Rybakov 2020 <sup>2</sup>  | 17 / 116      | 57     | 59     | (L)AR, APR, intersphincteric resection                                                                    | Mixed               | PEG day before surgery (16h)                                                                 | Erythromycin 500mg + metronidazole 500mg day before surgery (17h, 20h, 23h)                                                              | Ceftriaxone 1000mg                                                             |
| Schardey 2020 <sup>3</sup> | 15 / 80       | 40     | 40     | (L)AR                                                                                                     | Mixed               | PEG + electrolytes 3-6L day before surgery                                                   | Polymyxin B 100 mg + tobramycin 80 mg + vancomycin 125 mg, day before surgery till day 7, 4 times daily                                  | Decided by surgeon                                                             |
| Abis 2019 <sup>4</sup>     | 65 / 455      | 227    | 228    | LAR, LH, RH, TH, SR, other                                                                                | Mixed               | Unknown kind<br><i>* Only patients undergoing left-sided colonic, sigmoid and LAR</i>        | Amphotericin B 500 mg + 5 colistin sulphate 100 mg + tobramycin 80 mg, 3 days before till minimum of 3 days after surgery, 4 times daily | Cefazolin 1g + metronidazole 500 mg, Redose > 4hrs                             |
| Uchino 2019 <sup>5</sup>   | 63 / 325      | 162    | 163    | Intestinal resection (Small bowel resections included)                                                    | Open                | Sodium picosulphate hydrate 20ml 0.75%                                                       | Kanamycin 500mg + metronidazole 500mg day before surgery (14h, 15, 21h)                                                                  | Flomoxef Redose every 3 hrs                                                    |
| Anjum 2017 <sup>6</sup>    | 34 / 184      | 93     | 91     | LAR, LH, RH                                                                                               | Mixed               | Sodium phosphate 133ml twice day before surgery                                              | Metronidazole 400 mg + levofloxacin 200 mg day before surgery (15h, 19h, 23h)                                                            | Cephalosporin (2 <sup>nd</sup> gen) + metronidazole, Redose every 3 hrs        |
| Hata 2016 <sup>7</sup>     | 58 / 579      | 290    | 289    | AR, APR, colectomy                                                                                        | laparoscopic        | Sodium picosulphate 75mg + magnesium citrate 34 g + water 180ml, day before surgery          | Metronidazole 750mg + kanamycin 1g 13hrs and 9hrs before surgery                                                                         | Cefmetazole 1g, Redose every 3 hrs                                             |
| Ikeda 2016 <sup>8</sup>    | 51 / 511      | 256    | 255    | AR, APR, colonic surgery                                                                                  | laparoscopic        | Magnesium citrate + sodium picosulphate day before surgery (8h + 11h)                        | Metronidazole 750mg + kanamycin 1g day before surgery (15h, 21h)                                                                         | Cefmetazole, Redose >3hrs                                                      |
| Sadahiro 2014 <sup>9</sup> | 38 / 194      | 99     | 95     | Resection of colorectal tumor                                                                             | Mixed               | Sodium picosulphate 10ml 2 days before surgery + PEG 2.000ml day before surgery (morning)    | Kanamycin 500mg + metronidazole 500mg day before surgery (13h, 14h, 23h)                                                                 | Flomoxef 1g, Redose >3hrs                                                      |
| Oshima 2013 <sup>10</sup>  | 28 / 195      | 98     | 97     | Proctocolectomy                                                                                           | Open                | Magnesium citrate solution 1.8L day before surgery (11h)                                     | Kanamycin 500mg + metronidazole 500mg day before surgery (14h, 15h, 21h)                                                                 | Flomoxef 1g, Redose >3hrs                                                      |
| Roos 2011 <sup>11</sup>    | 60 / 289      | 146    | 143    | LH, RH, TH, (L)AR, ICR, SR, PC, CC, hepatopan-creatobiliary surgery, esophageal /gastric resection, other | Mixed               | PEG + electrolytes or sodium picosulphate                                                    | Polymyxin B sulphate 100mg + tobramycin 80mg + amphotericin B 500mg                                                                      | Cefuroxime 1.5g + metronidazole 500mg                                          |
| Horie 2007 <sup>12</sup>   | 26 / 91       | 45     | 46     | Resection of colorectal tumor                                                                             | Open                | PEG 2L 16hrs before surgery                                                                  | Kanamycin 1500mg daily start 3 days before surgery                                                                                       | Cefotiam hydrochloride                                                         |

|                                       |          |     |     |                                                                                        |              |                                                                                                                     |                                                                                                                              |                                         |
|---------------------------------------|----------|-----|-----|----------------------------------------------------------------------------------------|--------------|---------------------------------------------------------------------------------------------------------------------|------------------------------------------------------------------------------------------------------------------------------|-----------------------------------------|
| Kobayashi 2007 <sup>13</sup>          | 43 / 484 | 242 | 242 | AR, APR, anoabdomino-rectal resection, Hartmann's procedure                            | N/A          | PEG 2L day before surgery (10h)                                                                                     | Kanamycin 1g + erythromycin 400mg day before surgery (14h, 15h, 23 h)                                                        | Cefmetazole 1g after, Redose >3hrs      |
| Espin Basany 2005 <sup>14</sup>       | 32 / 300 | 100 | 200 | AR, APR, SR, segmental colon resection, TME-coloanal                                   | Open         | Sodium phosphate oral solution 45ml diluted in 90 ml of water day before surgery (11h, 17h)                         | Neomycin 1g + metronidazole 1g day before surgery (15h, 19h, 23h) OR Neomycin 1g + metronidazole 1g day before surgery (15h) | Cefoxitin 1g                            |
| Lewis 2002 <sup>15</sup>              | 27 / 208 | 104 | 106 | AR, APR, LH, RH, TH                                                                    | N/A          | Sodium phosphate until clear rectal effluent. If required, additional saline enemas day before surgery (18h)        | Neomycin 2g + metronidazole 2g day before surgery (19h, 23h)                                                                 | Amikacin 1g + metronidazole 1g          |
| Ishida 2001 <sup>16</sup>             | 45 / 143 | 71  | 72  | AR, APR, PC, colectomy, total pelvic exenteration, other                               | N/A          | PEG 2L day before surgery (15h-19h)                                                                                 | Kanamycin 500mg + erythromycin 400mg, start 2 days before surgery, 4 times daily                                             | Cefotiam 1g                             |
| Takesue 2000 <sup>17</sup>            | 16 / 83  | 45  | 38  | LAR, APR, LH, RH, TH, SR, ICR                                                          | N/A          | PEG day before surgery (10h-14h)                                                                                    | Kanamycin 500mg + metronidazole 500mg day before surgery (14h, 15h, 23h)                                                     | Cefmetazole 1g                          |
| Taylor 1994 <sup>18</sup>             | 83 / 368 | 189 | 179 | APR, colo(rectal) resection, Hartmann's resection, other                               | N/A          | Sodium picosulphate 1 sachets, day before surgery twice daily                                                       | Ciprofloxacin 500mg, 2 doses day before surgery                                                                              | Piperacillin 4g                         |
| Stellato 1990 <sup>19</sup>           | 10 / 102 | 51  | 51  | (Colo)rectal resection                                                                 | N/A          | Magnesium citrate 1.745 g in 296ml (morning) + (bi)phosphate enema 118ml (evening) day before and day of surgery    | Neomycin 1g + erythromycin 1g day before surgery (11h, 14h, 23h)                                                             | Cefoxitin 2g                            |
| Reynolds 1989 <sup>20</sup>           | 35 / 400 | 104 | 107 | (Colo)rectal resection                                                                 | N/A          | Magnesium sulphate 4g (up to 8 times) start 3 days before surgery + sodium picosulphate twice on day before surgery | Metronidazole 500mg (3 times daily) + neomycin 1g start day before surgery, 4 times daily                                    | Piperacillin 2g                         |
| Coppa 1988 <sup>21</sup>              | 35 / 310 | 141 | 169 | (Colo)rectal resection                                                                 | N/A          | Sodium phosphate day 2 and 3 before surgery + saline enemas two days before surgery                                 | Neomycin 8g/day, including loading dose + erythromycin 4g/day in doses for 24hrs before surgery                              | Cefoxitin 1-2g (weight adjusted)        |
| Lau 1988 <sup>22</sup>                | 16 / 132 | 67  | 65  | (L)AR, APR, LH, RH, TH, SR, subtotal colectomy, pelvic exenteration, palliative bypass | Open         | Bisacodyl and magnesium sulphate + saline enemas                                                                    | Neomycin 1g + erythromycin 1g day before surgery (13h, 14h, 23h)                                                             | Metronidazole 500mg + gentamicin 2mg/kg |
| Playforth 1988 <sup>23</sup>          | 36 / 119 | 58  | 61  | (Colo)rectal resection                                                                 | N/A          | Mannitol 100g in 1L water day before operation                                                                      | Neomycin 1g every six hrs + metronidazole 200mg every four hrs start 24hrs before surgery                                    | Metronidazole 0.5g                      |
| <b>MBP vs no preparation: 16 RCTs</b> |          |     |     |                                                                                        |              |                                                                                                                     |                                                                                                                              |                                         |
| Mai-Phan 2019 <sup>24</sup>           | 21 / 122 | 62  | 60  | Colectomy                                                                              | Laparoscopic | Sodium phosphate 2 bottles or PEG 2L                                                                                |                                                                                                                              | Yes, unknown kind                       |
| Bhat 2016 <sup>25</sup>               | 28 / 202 | 98  | 104 | (L)AR, APR, LH, RH, TH, SR                                                             | N/A          | PEG 2 packs in 4L water 12-16hrs before surgery                                                                     |                                                                                                                              | Ceftriaxone 1g + metronidazole 500mg    |

|                                  |            |     |     |                                                                    |       |                                                                                                                         |                                                                                           |                                                                                                                       |
|----------------------------------|------------|-----|-----|--------------------------------------------------------------------|-------|-------------------------------------------------------------------------------------------------------------------------|-------------------------------------------------------------------------------------------|-----------------------------------------------------------------------------------------------------------------------|
| Bhattacharjee 2015 <sup>26</sup> | 27 / 71    | 38  | 33  | LAR, APR, LH, RH, SR, PC                                           | Open  | PEG 1 pack in 2L water afternoon before surgery                                                                         |                                                                                           | Cefuroxime 1.5g + metronidazole 500 mg,                                                                               |
| Sasaki 2012 <sup>27</sup>        | 6 / 79     | 38  | 41  | LH, RH                                                             | Mixed | Sodium picosulphate hydrate 10mL start evening 2 days before surgery + 2L PEG morning before surgery                    |                                                                                           | Flomoxef 1g, Redose >3hrs                                                                                             |
| Bertani 2011 <sup>28</sup>       | 42 / 229   | 114 | 115 | LAR, LH, RH, TH,                                                   | Mixed | PEG 70mg in 1L, day before surgery four times (16h-20h) + glycerin enema 5% 2L day of surgery                           |                                                                                           | Cefoxitin 2g (allergy: gentamicin 80mg + clindamycin 600mg or metronidazole 500mg)                                    |
| Bretagnol 2010 <sup>29</sup>     | 34 / 178   | 89  | 89  | Rectal cancer sphincter saving resection                           | Mixed | Senna solution 1-2 packs in water 24h before surgery + povidone-iodine enema 1L evening before and >2h before surgery   |                                                                                           | Ceftriaxone 1g + metronidazole 500mg, Redose >2hrs                                                                    |
| Watanabe 2010 <sup>30</sup>      | 3 / 42     | 21  | 21  | Colonic resection                                                  | Mixed | Magnesium citrate 1.8L, 16–19h before surgery + glycerin enema 120mL, day of surgery                                    |                                                                                           | Cefmetazole, Redose every 3hrs                                                                                        |
| Pena-Soria 2008 <sup>31</sup>    | 37 / 129   | 65  | 64  | Colon or proximal rectal resection                                 | Open  | PEG 3L + conventional enemas                                                                                            |                                                                                           | Gentamicin 80mg + metronidazole 500mg                                                                                 |
| Contant 2007 <sup>32</sup>       | 283 / 1354 | 670 | 684 | Colorectal surgery with anastomosis                                | Open  | PEG 2-4L + bisacodyl or sodium phosphate solution                                                                       |                                                                                           | Local guideline                                                                                                       |
| Jung 2007 <sup>33</sup>          | 142 / 1343 | 686 | 657 | Surgery of the colon with anastomosis                              | Open  | PEG, sodium phosphate<br><i>Some patients only received enema</i>                                                       |                                                                                           | Local guideline                                                                                                       |
| Platell 2006 <sup>34</sup>       | 52 / 294   | 147 | 147 | AR, RH, TH, PC, (sub)total colectomy                               | Open  | PEG 3L day before surgery                                                                                               | <i>Sodium phosphate enema, 2-4hrs before surgery</i>                                      | Ticarcillin disodium / clavulanate potassium 3.1 g or gentamicin 2mg/kg + metronidazole 500mg                         |
| Bucher 2005 <sup>35</sup>        | 23 / 153   | 78  | 75  | AR, LH, TH, closure of Hartmann's                                  | Mixed | PEG 3L, 12-16hrs before surgery + saline enema 250ml before AR                                                          | <i>Saline enema 250 mL when AR</i>                                                        | Metronidazole + ceftriaxone                                                                                           |
| Fa-Si-Oen 2005 <sup>36</sup>     | 29 / 250   | 125 | 125 | LH, RH, TH, SR, other                                              | Open  | PEG 4L                                                                                                                  |                                                                                           | Cefazolin 2g + metronidazole 1.5g or gentamicin 240mg + metronidazole 1.5g                                            |
| Ram 2005 <sup>37</sup>           | 38 / 329   | 164 | 165 | (L)AR, APR, , LH, RH, TH, SR, subtotal colectomy                   | Open  | Sodium phosphate day before surgery                                                                                     |                                                                                           | Metronidazole 500mg + ceftriaxone 1g                                                                                  |
| Miettinen 2000 <sup>38</sup>     | 23 / 267   | 138 | 129 | (L)AR, APR, LH, RH, CC, ileal pouch                                | Open  | PEG until clear fluid day before surgery                                                                                |                                                                                           | Ceftriaxone 2g + metronidazole 1g                                                                                     |
| Burke 1994 <sup>39</sup>         | 14 / 169   | 82  | 87  | AR, LH                                                             | N/A   | Sodium picosulphate 10mg, day before surgery (morning, afternoon)                                                       |                                                                                           | Ceftriaxone 1g + metronidazole 500mg                                                                                  |
| <b>OA vs None: 5 RCTs</b>        |            |     |     |                                                                    |       |                                                                                                                         |                                                                                           |                                                                                                                       |
| Arezzo 2021 <sup>40</sup>        | 34/204     | 100 | 104 | RH, ICR, TH, LH, AR, subtotal colectomy, Hartmann procedure, other | Mixed | * <i>Some patients undergoing left sided colonic and anterior resections received MBP according to local guidelines</i> | Neomycin 25.000 UI (≈ 33mg) + bacitracin 2500 UI (≈ ,33mg) (24h, 16h + 8h before surgery) | Amoxicillin 2g + clavulanic acid 200mg (allergy: clindamycin 600mg + gentamicin 2mg/kg) Redosing if prolonged surgery |

|                                 |           |     |     |                                                                 |       |                                                  |                                                                                                                                                                            |                                          |
|---------------------------------|-----------|-----|-----|-----------------------------------------------------------------|-------|--------------------------------------------------|----------------------------------------------------------------------------------------------------------------------------------------------------------------------------|------------------------------------------|
| Espin Basany 2020 <sup>41</sup> | 193 / 536 | 267 | 269 | LH, RH, colectomy, segment resection, other                     | Mixed |                                                  | Ciprofloxacin 750mg day before surgery (12h, midnight) + metronidazole 250mg day before surgery (12h, 18h, midnight)                                                       | Cefuroxime 5g + metronidazole 1g         |
| Mulder 2020 <sup>42</sup>       | 11 / 78   | 39  | 39  | LAR, LH, RH, SR, (sub) total colectomy, other                   | Mixed |                                                  | Tobramycin 80mg + colistin sulphate 100mg start 3 days before surgery 4 times daily                                                                                        | According to national guideline          |
| Hanel 1980 <sup>43</sup>        | 0 / 67    | 34  | 33  | (Colo)rectal resection                                          | N/A   | <i>Daily enemas, start 4 days before surgery</i> | Metronidazole 200mg start four days before surgery 4 times daily + neomycin 1g start two day before surgery twice daily + <i>daily enemas, start 4 days before surgery</i> | Clindamycin 7mg/kg + cefazolin sodium 1g |
| Viddal 1980 <sup>44</sup>       | 2 / 42    | 21  | 21  | LAR, LH, RH, APR, PC, CC, jejunioileostomy, ileotransversostomy | Open  | <i>Enemas for 3 days before surgery</i>          | Tinidazole 2g start day before surgery and day 3-5 postoperatively + <i>enemas for 3 days before surgery</i>                                                               | Doxycycline 200mg                        |

#### OA vs MBP-OA: 3 RCTs

|                           |          |     |     |                                           |       |                                                                                            |                                                                                                               |                                                         |
|---------------------------|----------|-----|-----|-------------------------------------------|-------|--------------------------------------------------------------------------------------------|---------------------------------------------------------------------------------------------------------------|---------------------------------------------------------|
| Suzuki 2020 <sup>45</sup> | 15 / 251 | 126 | 125 | Colectomy                                 | Mixed | Sodium picosulphate 10mL, 2 days before surgery + PEG 2L, morning before surgery           | Kanamycin sulfate 500mg + metronidazole 500mg day before surgery (13h, 14h, 23h)                              | Flomoxef 1g, Redose >3hrs                               |
| Zmora 2006 <sup>46</sup>  | 32 / 249 | 129 | 120 | (L)AR, LH, SR, closure of Hartmann's      | N/A   | PEG 1 gallon day before surgery + sodium (bi)phosphate enema day of rectal surgery         | Neomycin 1g + erythromycin 1g day before surgery, 3 doses + sodium (bi)phosphate enema day of rectal surgery  | Metronidazole 500mg + gentamicin 240 mg + ampicillin 1g |
| Zmora 2003 <sup>47</sup>  | 36 / 380 | 193 | 187 | AR, LH, RH, SR, APR closure of Hartmann's | N/A   | PEG 1 gallon 12hrs-16hrs before surgery + sodium (bi)phosphate enema day of rectal surgery | Neomycin + erythromycin, 3 doses (unknown dose and timing) + sodium (bi)phosphate enema day of rectal surgery | Broad spectrum                                          |

#### MBP-OA vs None: 1 RCT

|                              |          |     |     |                                                    |       |                                            |                                                               |                                                                                 |
|------------------------------|----------|-----|-----|----------------------------------------------------|-------|--------------------------------------------|---------------------------------------------------------------|---------------------------------------------------------------------------------|
| Koskenvuo 2019 <sup>48</sup> | 34 / 397 | 196 | 200 | LH, RH, TH, AR, ICR, SR, subtotal colectomy, other | Mixed | PEG 2L + 1L clear fluid day before surgery | Neomycin 2g (19h) + metronidazole 2g (23h) day before surgery | Cefuroxime 1500 mg + metronidazole 500 mg, Redose >3hrs and/or blood loss >1,5L |
|------------------------------|----------|-----|-----|----------------------------------------------------|-------|--------------------------------------------|---------------------------------------------------------------|---------------------------------------------------------------------------------|

APR: abdominoperineal resection, CC: colostoma closure, ICR: ileocecal resection, (L)AR: (low) anterior resection, LH: left hemicolectomy, N/A: not available PC: proctocolectomy, PEG: polyethylene glycol, RH: right hemicolectomy, SG: sigmoid resection, TH: transverse hemicolectomy, TME: total mesorectal excision. \* Anastomotic leakage included in SSI

## Bibliography

1. Papp G, Saftics G, Szabó BE, Baracs J, Vereczkei A, Kollár D, et al. Systemic versus Oral and Systemic Antibiotic Prophylaxis (SOAP) study in colorectal surgery: prospective randomized multicentre trial. *Br J Surg.* 2021;108(3):271-6.
2. Rybakov E, Nagudov M, Sukhina M, Shelygin Y. Impact of oral antibiotic prophylaxis on surgical site infection after rectal surgery: results of randomized trial. *Int J Colorectal Dis.* 2021;36(2):323-30.
3. Schardey HM, Wirth U, Strauss T, Kasperek MS, Schneider D, Jauch KW. Prevention of anastomotic leak in rectal cancer surgery with local antibiotic decontamination: a prospective, randomized, double-blind, placebo-controlled single center trial. *Int J Colorectal Dis.* 2020;35(5):847-57.
4. Abis GSA, Stockmann HBAC, Bonjer HJ, van Veenendaal N, van Doorn-Schepens MLM, Budding AE, et al. Randomized clinical trial of selective decontamination of the digestive tract in elective colorectal cancer surgery (SELECT trial). *Br J Surg.* 2019;106(4):355-63.
5. Uchino M, Ikeuchi H, Bando T, Chohno T, Sasaki H, Horio Y, et al. Efficacy of Preoperative Oral Antibiotic Prophylaxis for the Prevention of Surgical Site Infections in Patients With Crohn Disease: A Randomized Controlled Trial. *Ann Surg.* 2019;269(3):420-6.
6. Anjum N, Ren J, Wang G, Li G, Wu X, Dong H, et al. A Randomized Control Trial of Preoperative Oral Antibiotics as Adjunct Therapy to Systemic Antibiotics for Preventing Surgical Site Infection in Clean Contaminated, Contaminated, and Dirty Type of Colorectal Surgeries. *Dis Colon Rectum.* 2017;60(12):1291-8.
7. Hata H, Yamaguchi T, Hasegawa S, Nomura A, Hida K, Nishitai R, et al. Oral and Parenteral Versus Parenteral Antibiotic Prophylaxis in Elective Laparoscopic Colorectal Surgery (JMTO PREV 07-01): A Phase 3, Multicenter, Open-label, Randomized Trial. *Ann Surg.* 2016;263(6):1085-91.
8. Ikeda A, Konishi T, Ueno M, Fukunaga Y, Nagayama S, Fujimoto Y, et al. Randomized clinical trial of oral and intravenous versus intravenous antibiotic prophylaxis for laparoscopic colorectal resection. *Br J Surg.* 2016;103(12):1608-15.
9. Sadahiro S, Suzuki T, Tanaka A, Okada K, Kamata H, Ozaki T, et al. Comparison between oral antibiotics and probiotics as bowel preparation for elective colon cancer surgery to prevent infection: prospective randomized trial. *Surgery.* 2014;155(3):493-503.
10. Oshima T, Takesue Y, Ikeuchi H, Matsuoka H, Nakajima K, Uchino M, et al. Preoperative oral antibiotics and intravenous antimicrobial prophylaxis reduce the incidence of surgical site infections in patients with ulcerative colitis undergoing IPAA. *Dis Colon Rectum.* 2013;56(10):1149-55.
11. Roos D, Dijkstra LM, Oudemans-van Straaten HM, de Wit LT, Gouma DJ, Gerhards MF. Randomized clinical trial of perioperative selective decontamination of the digestive tract versus placebo in elective gastrointestinal surgery. *Br J Surg.* 2011;98(10):1365-72.
12. Horie T. Randomized controlled trial on the necessity of chemical cleaning as preoperative preparation for Colorectal Cancer Surgery. 2007.
13. Kobayashi M, Mohri Y, Tonouchi H, Miki C, Nakai K, Kusunoki M, et al. Randomized clinical trial comparing intravenous antimicrobial prophylaxis alone with oral and intravenous antimicrobial prophylaxis for the prevention of a surgical site infection in colorectal cancer surgery. *Surg Today.* 2007;37(5):383-8.
14. Espin-Basany E, Sanchez-Garcia JL, Lopez-Cano M, Lozoya-Trujillo R, Medarde-Ferrer M, Armadans-Gil L, et al. Prospective, randomised study on antibiotic prophylaxis in colorectal surgery. Is it really necessary to use oral antibiotics? *Int J Colorectal Dis.* 2005;20(6):542-6.
15. Lewis RT. Oral versus systemic antibiotic prophylaxis in elective colon surgery: a randomized study and meta-analysis send a message from the 1990s. *Can J Surg.* 2002;45(3):173-80.

16. Ishida H, Yokoyama M, Nakada H, Inokuma S, Hashimoto D. Impact of oral antimicrobial prophylaxis on surgical site infection and methicillin-resistant *Staphylococcus aureus* infection after elective colorectal surgery. Results of a prospective randomized trial. *Surgery today*. 2001;31(11):979-83.
17. Takesue Y, Yokoyama T, Akagi S, Ohge H, Murakami Y, Sakashita Y, et al. A brief course of colon preparation with oral antibiotics. *Surg Today*. 2000;30(2):112-6.
18. Taylor EW, Lindsay G. Selective decontamination of the colon before elective colorectal surgery. West of Scotland Surgical Infection Study Group. *World J Surg*. 1994;18(6):926-31; discussion 31-2.
19. Stellato TA, Danziger LH, Gordon N, Hau T, Hull CC, Zollinger RM, et al. Antibiotics in elective colon surgery. A randomized trial of oral, systemic, and oral/systemic antibiotics for prophylaxis. *Am Surg*. 1990;56(4):251-4.
20. Reynolds J, Jones J, Evans D, Hardcastle J. Do preoperative oral antibiotics influence sepsis rates following elective colorectal surgery in patients receiving perioperative intravenous prophylaxis. *Surg Res Commun*. 1989;7:71-7.
21. Coppa GF, Eng K. Factors involved in antibiotic selection in elective colon and rectal surgery. *Surgery*. 1988;104(5):853-8.
22. Lau WY, Chu KW, Poon GP, Ho KK. Prophylactic antibiotics in elective colorectal surgery. *Br J Surg*. 1988;75(8):782-5.
23. Playforth MJ, Smith GM, Evans M, Pollock AV. Antimicrobial bowel preparation. Oral, parenteral, or both? *Dis Colon Rectum*. 1988;31(2):90-3.
24. Mai-Phan AT, Nguyen H, Nguyen TT, Nguyen DA, Thai TT. Randomized controlled trial of mechanical bowel preparation for laparoscopy-assisted colectomy. *Asian J Endosc Surg*. 2019;12(4):408-11.
25. Bhat AH, Parray FQ, Chowdri NA, Wani RA, Thakur N, Nazki S, et al. Mechanical bowel preparation versus no preparation in elective colorectal surgery: a prospective randomized study. *International Journal of Surgery Open*. 2016;2:26-30.
26. Bhattacharjee PK, Chakraborty S. An Open-Label Prospective Randomized Controlled Trial of Mechanical Bowel Preparation vs Nonmechanical Bowel Preparation in Elective Colorectal Surgery: Personal Experience. *Indian J Surg*. 2015;77(Suppl 3):1233-6.
27. Sasaki J, Matsumoto S, Kan H, Yamada T, Koizumi M, Mizuguchi Y, et al. Objective assessment of postoperative gastrointestinal motility in elective colonic resection using a radiopaque marker provides an evidence for the abandonment of preoperative mechanical bowel preparation. *J Nippon Med Sch*. 2012;79(4):259-66.
28. Bertani E, Chiappa A, Biffi R, Bianchi PP, Radice D, Branchi V, et al. Comparison of oral polyethylene glycol plus a large volume glycerine enema with a large volume glycerine enema alone in patients undergoing colorectal surgery for malignancy: a randomized clinical trial. *Colorectal Dis*. 2011;13(10):e327-34.
29. Bretagnol F, Panis Y, Rullier E, Rouanet P, Berdah S, Dousset B, et al. Rectal cancer surgery with or without bowel preparation: The French GRECCAR III multicenter single-blinded randomized trial. *Ann Surg*. 2010;252(5):863-8.
30. Watanabe M, Murakami M, Nakao K, Asahara T, Nomoto K, Tsunoda A. Randomized clinical trial of the influence of mechanical bowel preparation on faecal microflora in patients undergoing colonic cancer resection. *Br J Surg*. 2010;97(12):1791-7.
31. Pena-Soria MJ, Mayol JM, Anula R, Arceo-Escolar A, Fernandez-Represa JA. Single-blinded randomized trial of mechanical bowel preparation for colon surgery with primary intraperitoneal anastomosis. *J Gastrointest Surg*. 2008;12(12):2103-8; discussion 8-9.
32. Contant CM, Hop WC, van't Sant HP, Oostvogel HJ, Smeets HJ, Stassen LP, et al. Mechanical bowel preparation for elective colorectal surgery: a multicentre randomised trial. *Lancet*. 2007;370(9605):2112-7.

33. Jung B, Lannerstad O, Pählman L, Arodell M, Unosson M, Nilsson E. Preoperative mechanical preparation of the colon: the patient's experience. *BMC Surg.* 2007;7:5.
34. Platell C, Barwood N, Makin G. Randomized clinical trial of bowel preparation with a single phosphate enema or polyethylene glycol before elective colorectal surgery. *Br J Surg.* 2006;93(4):427-33.
35. Bucher P, Gervaz P, Soravia C, Mermillod B, Erne M, Morel P. Randomized clinical trial of mechanical bowel preparation versus no preparation before elective left-sided colorectal surgery. *Br J Surg.* 2005;92(4):409-14.
36. Fa-Si-Oen P, Roumen R, Buitenweg J, van de Velde C, van Geldere D, Putter H, et al. Mechanical bowel preparation or not? Outcome of a multicenter, randomized trial in elective open colon surgery. *Dis Colon Rectum.* 2005;48(8):1509-16.
37. Ram E, Sherman Y, Weil R, Vishne T, Kravarusic D, Dreznik Z. Is mechanical bowel preparation mandatory for elective colon surgery? A prospective randomized study. *Arch Surg.* 2005;140(3):285-8.
38. Miettinen RP, Laitinen ST, Mäkelä JT, Pääkkönen ME. Bowel preparation with oral polyethylene glycol electrolyte solution vs. no preparation in elective open colorectal surgery: prospective, randomized study. *Dis Colon Rectum.* 2000;43(5):669-75; discussion 75-7.
39. Burke P, Mealy K, Gillen P, Joyce W, Traynor O, Hyland J. Requirement for bowel preparation in colorectal surgery. *Br J Surg.* 1994;81(6):907-10.
40. Arezzo A, Mistrangelo M, Bonino MA, Salusso P, Forcignanò E, Vettoretto N, et al. Oral neomycin and bacitracin are effective in preventing surgical site infections in elective colorectal surgery: a multicentre, randomized, parallel, single-blinded trial (COLORAL-1). *Updates Surg.* 2021.
41. Espin Basany E, Solís-Peña A, Pellino G, Kreisler E, Fracalvieri D, Muineló-Lorenzo M, et al. Preoperative oral antibiotics and surgical-site infections in colon surgery (ORALEV): a multicentre, single-blind, pragmatic, randomised controlled trial. *Lancet Gastroenterol Hepatol.* 2020;5(8):729-38.
42. Mulder T, Kluytmans-van den Bergh M, Vlamincx B, Roos D, de Smet AM, de Vos Tot Nederveen Cappel R, et al. Prevention of severe infectious complications after colorectal surgery using oral non-absorbable antimicrobial prophylaxis: results of a multicenter randomized placebo-controlled clinical trial. *Antimicrob Resist Infect Control.* 2020;9(1):84.
43. Hanel KC, King DW, McAllister ET, Reiss-Levy E. Single-dose parenteral antibiotics as prophylaxis against wound infections in colonic operations. *Dis Colon Rectum.* 1980;23(2):98-101.
44. Viddal KO, Semb LS. Tinidazole and doxycycline compared to doxycycline alone as prophylactic antimicrobial agents in elective colorectal surgery. *Scand J Gastroenterol Suppl.* 1980;59:21-4.
45. Suzuki T, Sadahiro S, Tanaka A, Okada K, Saito G, Miyakita H, et al. Usefulness of Preoperative Mechanical Bowel Preparation in Patients with Colon Cancer who Undergo Elective Surgery: A Prospective Randomized Trial Using Oral Antibiotics. *Dig Surg.* 2020;37(3):192-8.
46. Zmora O, Mahajna A, Bar-Zakai B, Hershko D, Shabtai M, Krausz MM, et al. Is mechanical bowel preparation mandatory for left-sided colonic anastomosis? Results of a prospective randomized trial. *Tech Coloproctol.* 2006;10(2):131-5.
47. Zmora O, Mahajna A, Bar-Zakai B, Rosin D, Hershko D, Shabtai M, et al. Colon and rectal surgery without mechanical bowel preparation: a randomized prospective trial. *Ann Surg.* 2003;237(3):363-7.
48. Koskenvuo L, Lehtonen T, Koskensalo S, Rasilainen S, Klintrup K, Ehrlich A, et al. Mechanical and oral antibiotic bowel preparation versus no bowel preparation for elective colectomy (MOBILE): a multicentre, randomised, parallel, single-blinded trial. *Lancet.* 2019;394(10201):840-8.

## Appendix 4. Sensitivity and Subgroup analyses

Studies published after the year 2000 (39 of 48 studies) showed comparable results with the primary analysis.

For anastomotic leakage (AL) and mortality, we also found comparable results to the primary analysis.

When looking at RCTs performing laparoscopic or laparoscopic and open procedures (in contrast to only open procedures), we see a significant benefit of MBP-OA over all other bowel preparation options for both SSI and AL. The RRs for mortality are very imprecise.

The subgroup analysis with and without oral aminoglycosides show no large differences in relative risks. RR for AL without aminoglycosides comparing MBP-OA and only OA is significantly lower (RR 0.29, 95% CI 0.09 – 0.89).

Mortality relative risks with the use of aminoglycosides are comparable with the primary analysis. There are no RCTs investigating only OA without aminoglycosides with mortality rates and are therefore not shown in the league table (Appendix 4.c).

### RCT's published after year 2000

#### a. Total SSI (RR with 95% CI)

|                                     |                                     |                              |                             |
|-------------------------------------|-------------------------------------|------------------------------|-----------------------------|
| <b>MBP-OA</b><br>P-score 0.942      |                                     |                              |                             |
| 0.84<br>(0.58 - 1.21)               | <b>OA</b><br>P-score 0.718          |                              |                             |
| <b>0.56</b><br><b>(0.44 - 0.73)</b> | <b>0.67</b><br><b>(0.48 - 0.95)</b> | <b>None</b><br>P-score 0.230 |                             |
| <b>0.54</b><br><b>(0.44 - 0.65)</b> | <b>0.64</b><br><b>(0.45 - 0.92)</b> | 0.95<br>(0.78 - 1.16)        | <b>MBP</b><br>P-score 0.110 |

#### b. Anastomotic leakage (RR with 95% CI)

|                                     |                                     |                             |                              |
|-------------------------------------|-------------------------------------|-----------------------------|------------------------------|
| <b>MBP-OA</b><br>P-score 0.966      |                                     |                             |                              |
| 0.76<br>(0.50 - 1.15)               | <b>OA</b><br>P-score 0.648          |                             |                              |
| <b>0.62</b><br><b>(0.46 - 0.85)</b> | 0.82<br>(0.58 - 1.16)               | <b>MBP</b><br>P-score 0.267 |                              |
| <b>0.59</b><br><b>(0.41 - 0.85)</b> | <b>0.78</b><br><b>(0.61 - 0.99)</b> | 0.94<br>(0.73 - 1.22)       | <b>None</b><br>P-score 0.119 |

#### c. Mortality (RR with 95% CI)

|                             |                                |                              |                            |
|-----------------------------|--------------------------------|------------------------------|----------------------------|
| <b>MBP</b><br>P-score 0.709 |                                |                              |                            |
| 0.94<br>(0.45 - 1.95)       | <b>MBP-OA</b><br>P-score 0.630 |                              |                            |
| 0.92<br>(0.59 - 1.44)       | 0.99<br>(0.43 - 2.27)          | <b>None</b><br>P-score 0.509 |                            |
| 0.77<br>(0.22 - 2.69)       | 0.82<br>(0.26 - 2.59)          | 0.83<br>(0.23 - 2.99)        | <b>OA</b><br>P-score 0.151 |



Oral antibiotic regimen with or without aminoglycosides

a.

Total SSI (RR with 95% CI) **with** aminoglycosides

|                                     |                            |                              |                             |
|-------------------------------------|----------------------------|------------------------------|-----------------------------|
| <b>MBP-OA</b><br>P- score 0.914     |                            |                              |                             |
| 0.87<br>(0.58 – 1.32)               | <b>OA</b><br>P-score 0.729 |                              |                             |
| <b>0.58</b><br><b>(0.48 – 0.69)</b> | 0.66<br>(0.43 – 1.01)      | <b>None</b><br>P-score 0.239 |                             |
| <b>0.60</b><br><b>(0.47 – 0.77)</b> | 0.69<br>(0.45 – 1.06)      | 1.05<br>(0.86 – 1.27)        | <b>MBP</b><br>P-score 0.118 |

Total SSI (RR with 95% CI) **without** aminoglycosides

|                                     |                            |                              |                             |
|-------------------------------------|----------------------------|------------------------------|-----------------------------|
| <b>MBP-OA</b><br>P- score 0.984     |                            |                              |                             |
| 0.57<br>(0.29 – 1.10)               | <b>OA</b><br>P-score 0.645 |                              |                             |
| <b>0.39</b><br><b>(0.24 – 0.64)</b> | 0.70<br>(0.44 – 1.09)      | <b>None</b><br>P-score 0.239 |                             |
| <b>0.38</b><br><b>(0.24 – 0.59)</b> | 0.67<br>(0.41 – 1.09)      | 0.96<br>(0.79 – 1.16)        | <b>MBP</b><br>P-score 0.132 |

b.

Anastomotic leakage (RR with 95% CI) **with** aminoglycosides

|                                     |                            |                             |                              |
|-------------------------------------|----------------------------|-----------------------------|------------------------------|
| <b>MBP-OA</b><br>P-score 0.879      |                            |                             |                              |
| 0.88<br>(0.46 – 1.69)               | <b>OA</b><br>P-score 0.679 |                             |                              |
| <b>0.67</b><br><b>(0.49 – 0.91)</b> | 0.75<br>(0.39 – 1.44)      | <b>MBP</b><br>P-score 0.324 |                              |
| <b>0.60</b><br><b>(0.42 – 0.88)</b> | 0.68<br>(0.36 – 1.29)      | 0.91<br>(0.70 - 1.18)       | <b>None</b><br>P-score 0.118 |

Anastomotic leakage (RR with 95% CI) **without** aminoglycosides

|                                     |                                     |                             |                              |
|-------------------------------------|-------------------------------------|-----------------------------|------------------------------|
| <b>MBP-OA</b><br>P-score 0.990      |                                     |                             |                              |
| <b>0.29</b><br><b>(0.09 – 0.89)</b> | <b>OA</b><br>P-score 0.512          |                             |                              |
| <b>0.27</b><br><b>(0.09 - 0.80)</b> | 0.96<br>(0.65 - 1.41)               | <b>MBP</b><br>P-score 0.443 |                              |
| <b>0.23</b><br><b>(0.08 - 0.68)</b> | <b>0.80</b><br><b>(0.61 – 1.04)</b> | 0.83<br>(0.63 - 1.09)       | <b>None</b><br>P-score 0.049 |

c.

Mortality (RR with 95% CI) **with** aminoglycosides

|                             |                                |                              |                            |
|-----------------------------|--------------------------------|------------------------------|----------------------------|
| <b>MBP</b><br>P-score 0.549 |                                |                              |                            |
| 0.95<br>(0.52 – 1.47)       | <b>MBP-OA</b><br>P-score 0.423 |                              |                            |
| 0.89<br>(0.24 – 1.39)       | 0.94<br>(0.44 – 1.98)          | <b>None</b><br>P-score 0.358 |                            |
| 1.23<br>(0.29 – 5.27)       | 1.29<br>(0.34 – 4.85)          | 1.38<br>(0.30 – 6.32)        | <b>OA</b><br>P-score 0.640 |

Mortality (RR with 95% CI) **without** aminoglycosides

|                             |                                |                              |           |
|-----------------------------|--------------------------------|------------------------------|-----------|
| <b>MBP</b><br>P-score 0.501 |                                |                              |           |
| 1.26<br>(0.45 – 3.57)       | <b>MBP-OA</b><br>P-score 0.695 |                              |           |
| 0.90<br>(0.58 – 1.42)       | 0.72<br>(0.23 – 2.22)          | <b>None</b><br>P-score 0.305 |           |
|                             |                                |                              | <b>OA</b> |

## Appendix 5. Risk of bias assessment

-  Low risk
-  Some concerns
-  High risk

|                    | <u>Randomisation process</u>                                                        | <u>Deviations from the intended interventions</u>                                   | <u>Missing outcome data</u>                                                         | <u>Measurement of the outcome</u>                                                    | <u>Selection for the reported results</u>                                             | <u>Overall</u>                                                                        |
|--------------------|-------------------------------------------------------------------------------------|-------------------------------------------------------------------------------------|-------------------------------------------------------------------------------------|--------------------------------------------------------------------------------------|---------------------------------------------------------------------------------------|---------------------------------------------------------------------------------------|
| Arezzo 2021        |    |    |    |    |    |    |
| Papp 2021          |    |    |    |    |    |    |
| Espin Basany 2020  |    |    |    |    |    |    |
| Rybakov 2020       |   |   |   |   |   |   |
| Schardey 2020      |  |  |  |  |  |  |
| Mulder 2020        |  |  |  |  |  |  |
| Suzuki 2020        |  |  |  |  |  |  |
| Abis 2019          |  |  |  |  |  |  |
| Koskenvuo 2019     |  |  |  |  |  |  |
| Mai-Phan 2019      |  |  |  |  |  |  |
| Uchino 2019        |  |  |  |  |  |  |
| Anjum 2017         |  |  |  |  |  |  |
| Bhat 2016          |  |  |  |  |  |  |
| Hata 2016          |  |  |  |  |  |  |
| Ikeda 2016         |  |  |  |  |  |  |
| Bhattacharjee 2015 |  |  |  |  |  |  |
| Sadahiro 2014      |  |  |  |  |  |  |
| Oshima 2013        |  |  |  |  |  |  |
| Sasaki 2012        |  |  |  |  |  |  |

|                   |   |   |   |   |   |   |
|-------------------|---|---|---|---|---|---|
| Bertani 2011      | + | + | + | ! | + | ! |
| Roos 2011         | + | + | + | + | ! | ! |
| Bretagnol 2010    | + | + | + | + | + | + |
| Watanabe 2010     | + | + | + | ! | ! | ! |
| Pena-Soria 2008   | + | ! | + | + | + | ! |
| Contant 2007      | + | + | + | ! | + | ! |
| Horie 2007        | + | + | + | ! | ! | ! |
| Jung 2007         | + | + | + | ! | + | + |
| Kobayashi 2007    | + | + | + | ! | ! | ! |
| Platell 2006      | + | + | + | + | ! | ! |
| Zmora 2006        | + | ! | + | ! | ! | ! |
| Bucher 2005       | + | + | + | + | ! | ! |
| Fa-Si-Oen 2005    | + | + | + | + | ! | ! |
| Ram 2005          | + | + | + | ! | ! | ! |
| Espin-Basany 2005 | + | + | + | + | ! | ! |
| Zmora 2003        | + | + | + | ! | ! | ! |
| Lewis 2002        | + | + | + | + | ! | ! |
| Ishida 2001       | + | + | + | + | ! | ! |
| Miettinen 2000    | + | ! | + | ! | ! | ! |
| Takesue 2000      | ! | ! | + | ! | ! | ! |
| Burke 1994        | + | + | + | + | ! | ! |
| Taylor 1994       | + | ! | + | + | ! | ! |
| Stellato 1990     | + | + | + | + | ! | ! |
| Reynolds 1989     | + | ! | + | ! | ! | ! |
| Coppa 1988        | + | ! | + | + | ! | ! |
| Playforth 1988    | + | ! | + | ! | ! | ! |
| Lau 1988          | + | ! | + | + | ! | ! |
| Hanel 1980        | + | ! | + | + | + | ! |
| Viddal 1980       | + | + | + | + | ! | ! |

## Appendix 6. Funnel plots

### 6.a. Total SSI

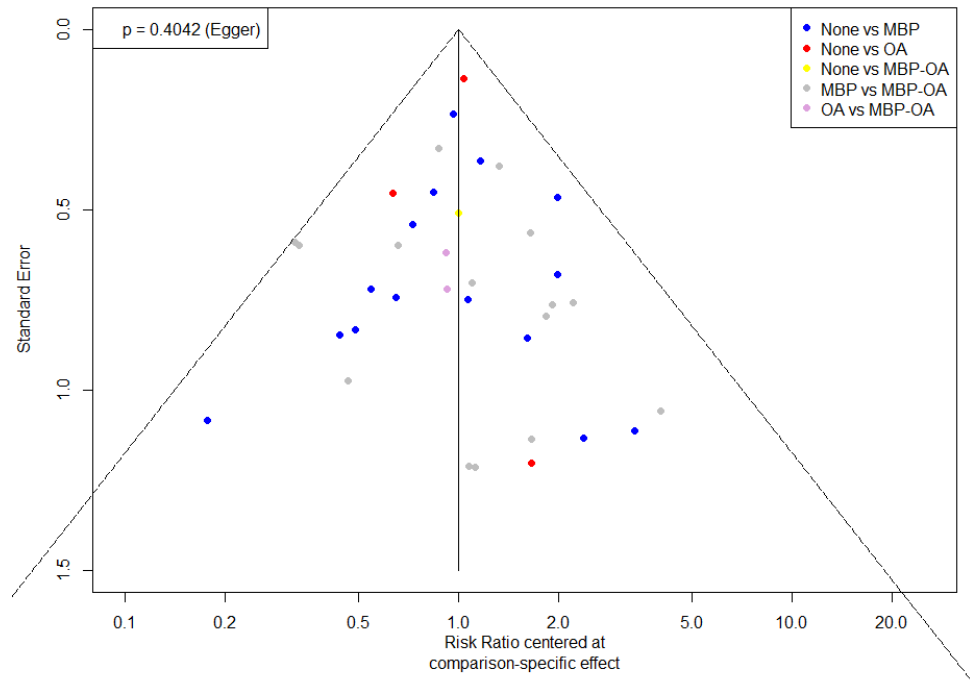

### 6.b. Anastomotic leakage

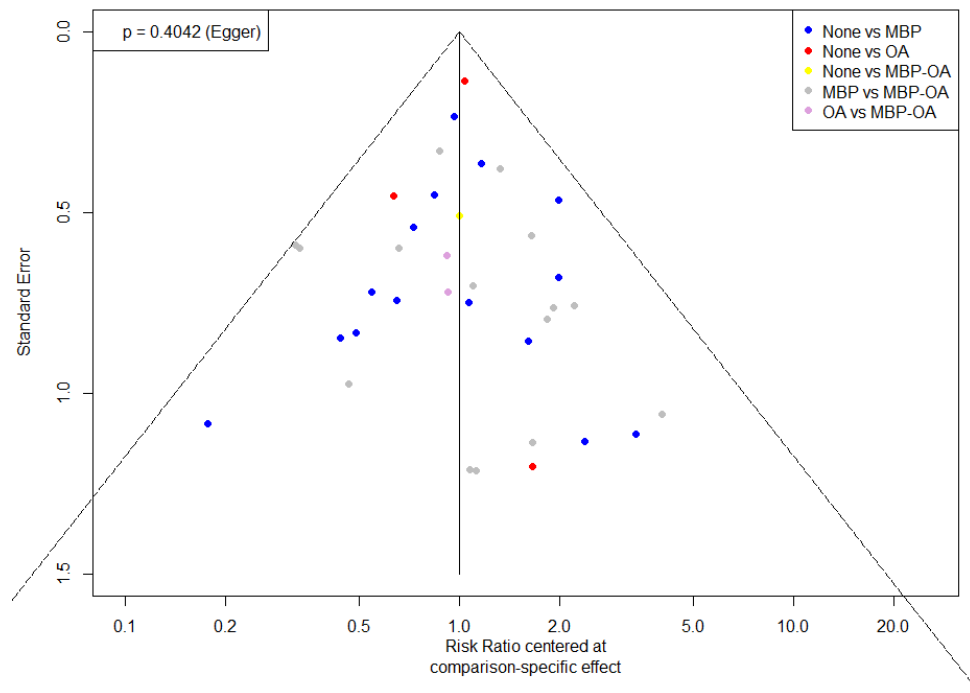

### 6.c. Mortality

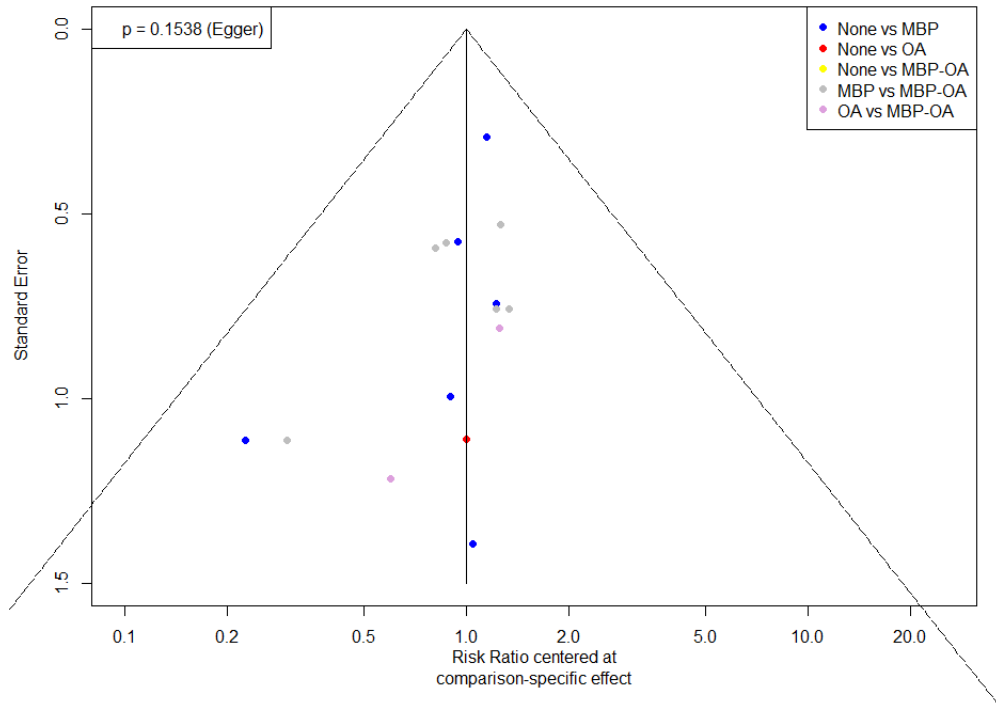

## Supplement 7 GRADE assessment

### 7.a. GRADE assessment with certainty levels for outcome measure: surgical site infections.

| Comparison    | Direct evidence                     |                     | Indirect evidence                   |                     | Network meta-analysis               |                     |
|---------------|-------------------------------------|---------------------|-------------------------------------|---------------------|-------------------------------------|---------------------|
|               | Relative Risk (95%CI)               | Quality of evidence | Relative Risk (95%CI)               | Quality of evidence | Relative Risk (95%CI)               | Quality of evidence |
| MBP-OA v OA   | 0.85<br>(0.51 - 1.41)               | ⊕ ○ ○ ○<br>Very Low | 0.84<br>(0.52 - 1.35)               | ⊕ ⊕ ○ ○<br>Low      | 0.84<br>(0.60 - 1.19)               | ⊕ ⊕ ○ ○<br>Low      |
| MBP-OA v MBP  | <b>0.55</b><br><b>(0.46 - 0.65)</b> | ⊕ ⊕ ⊕ ○<br>Moderate | <b>0.57</b><br><b>(0.33 - 0.99)</b> | ⊕ ⊕ ○ ○<br>Low      | <b>0.55</b><br><b>(0.47 - 0.65)</b> | ⊕ ⊕ ⊕ ○<br>Moderate |
| MBP-OA v None | 0.63<br>(0.28 - 1.42)               | ⊕ ○ ○ ○<br>Very Low | <b>0.57</b><br><b>(0.45 - 0.73)</b> | ⊕ ⊕ ⊕ ○<br>Moderate | <b>0.57</b><br><b>(0.45 - 0.72)</b> | ⊕ ⊕ ⊕ ○<br>Moderate |
| OA v MBP      | -                                   | -                   | <b>0.65</b><br><b>(0.46 - 0.92)</b> | ⊕ ⊕ ○ ○<br>Low      | <b>0.65</b><br><b>(0.46 - 0.92)</b> | ⊕ ⊕ ○ ○<br>Low      |
| OA v None     | 0.68<br>(0.46 - 1.02)               | ⊕ ⊕ ○ ○<br>Low      | 0.68<br>(0.38 - 1.20)               | ⊕ ○ ○ ○<br>Low      | <b>0.68</b><br><b>(0.49 - 0.95)</b> | ⊕ ⊕ ○ ○<br>Low      |
| MBP v None    | 1.04<br>(0.85 - 1.27)               | ⊕ ⊕ ○ ○<br>Low      | 1.09<br>(0.64 - 1.87)               | ⊕ ○ ○ ○<br>Low      | 1.05<br>(0.87 - 1.26)               | ⊕ ⊕ ○ ○<br>Low      |

#### Direct evidence

|                |                |                                      |
|----------------|----------------|--------------------------------------|
| MBP-OA v OA:   | Very low       | (risk of bias -1 and imprecision -2) |
| MBP-OA v MBP:  | Moderate       | (risk of bias -1)                    |
| MBP-OA v None: | Very low       | (risk of bias -1 and imprecision -2) |
| OA v MBP:      | Not applicable |                                      |
| OA v None:     | Low            | (risk of bias -1 and imprecision -1) |
| MBP v None:    | Low            | (risk of bias -1 and imprecision -1) |

#### Indirect evidence

|                |          |                                      |
|----------------|----------|--------------------------------------|
| MBP-OA v OA:   | Very low | (risk of bias -1 and imprecision -2) |
| MBP-OA v MBP:  | Low      | (risk of bias -1 and imprecision -1) |
| MBP-OA v None: | Moderate | (risk of bias -1)                    |
| OA v MBP:      | Low      | (risk of bias -1 and imprecision -1) |
| OA v None:     | Low      | (risk of bias -1 and imprecision -1) |
| MBP v None:    | Very Low | (risk of bias -1 and imprecision -2) |

#### Network evidence

If only direct or indirect evidence is available for a given comparison, the network quality rating will be based on that estimate. When, for a particular comparison, both direct and indirect evidence are available, we used the highest of the two quality ratings as the quality rating for the NMA estimate.

**Conclusions surgical site infections (SSI)**

MBP-OA versus OA

|                  |                                                                                                                                                                                                                                             |
|------------------|---------------------------------------------------------------------------------------------------------------------------------------------------------------------------------------------------------------------------------------------|
| <b>Low GRADE</b> | The evidence suggests that mechanical bowel preparation combined with oral antibiotics results in little to no difference in surgical site infections compared to only oral antibiotics in patients undergoing elective colorectal surgery. |
|------------------|---------------------------------------------------------------------------------------------------------------------------------------------------------------------------------------------------------------------------------------------|

MBP-OA versus MBP

|                       |                                                                                                                                                                                                       |
|-----------------------|-------------------------------------------------------------------------------------------------------------------------------------------------------------------------------------------------------|
| <b>Moderate GRADE</b> | Mechanical bowel preparation combined with oral antibiotics likely reduces surgical site infections compared to only mechanical bowel preparation in patients undergoing elective colorectal surgery. |
|-----------------------|-------------------------------------------------------------------------------------------------------------------------------------------------------------------------------------------------------|

MBP-OA versus None

|                       |                                                                                                                                                                                      |
|-----------------------|--------------------------------------------------------------------------------------------------------------------------------------------------------------------------------------|
| <b>Moderate GRADE</b> | Mechanical bowel preparation combined with oral antibiotics likely reduces surgical site infections compared with no preparation in patients undergoing elective colorectal surgery. |
|-----------------------|--------------------------------------------------------------------------------------------------------------------------------------------------------------------------------------|

OA versus MBP

|                  |                                                                                                                                                                                |
|------------------|--------------------------------------------------------------------------------------------------------------------------------------------------------------------------------|
| <b>Low GRADE</b> | The evidence suggests only oral antibiotics reduces surgical site infections compared to only mechanical bowel preparation in patients undergoing elective colorectal surgery. |
|------------------|--------------------------------------------------------------------------------------------------------------------------------------------------------------------------------|

OA versus None

|                  |                                                                                                                                                             |
|------------------|-------------------------------------------------------------------------------------------------------------------------------------------------------------|
| <b>Low GRADE</b> | The evidence suggests only oral antibiotics reduces surgical site infections compared to no preparation in patients undergoing elective colorectal surgery. |
|------------------|-------------------------------------------------------------------------------------------------------------------------------------------------------------|

MBP versus None

|                  |                                                                                                                                                                                                            |
|------------------|------------------------------------------------------------------------------------------------------------------------------------------------------------------------------------------------------------|
| <b>Low GRADE</b> | The evidence suggests that only mechanical bowel preparation results in little to no difference in surgical site infections compared to no preparation in patients undergoing elective colorectal surgery. |
|------------------|------------------------------------------------------------------------------------------------------------------------------------------------------------------------------------------------------------|



## 7.2. GRADE assessment with certainty levels: Anastomotic leakage

| Comparison     | Direct evidence                     |                       | Indirect evidence                   |                       | Network meta-analysis               |                       |
|----------------|-------------------------------------|-----------------------|-------------------------------------|-----------------------|-------------------------------------|-----------------------|
|                | Relative Risk (95%CI)               | Quality of evidence   | Relative Risk (95%CI)               | Quality of evidence   | Relative Risk (95%CI)               | Quality of evidence   |
| MBP-OA v OA    | 1.66<br>(0.67 - 4.11)               | ⊕ ○ ○ ○ ○<br>Very Low | <b>0.63</b><br><b>(0.39 - 0.99)</b> | ⊕ ⊕ ○ ○ ○<br>Low      | 0.76<br>(0.51 - 1.15)               | ⊕ ⊕ ○ ○ ○<br>Low      |
| MBP-OA v MBP * | <b>0.55</b><br><b>(0.40 - 0.76)</b> | ⊕ ⊕ ⊕ ○ ○<br>Moderate | 1.32<br>(0.63 - 2.78)               | ⊕ ○ ○ ○ ○<br>Very Low | <b>0.63</b><br><b>(0.47 - 0.84)</b> | ⊕ ⊕ ⊕ ○ ○<br>Moderate |
| MBP-OA v None  | 0.89<br>(0.33 - 2.42)               | ⊕ ○ ○ ○ ○<br>Very Low | <b>0.56</b><br><b>(0.38 - 0.81)</b> | ⊕ ⊕ ○ ○ ○<br>Low      | <b>0.59</b><br><b>(0.42 - 0.84)</b> | ⊕ ⊕ ○ ○ ○<br>Low      |
| OA v MBP       | -                                   | -                     | 0.83<br>(0.59 - 1.17)               | ⊕ ⊕ ○ ○ ○<br>Low      | 0.83<br>(0.59 - 1.17)               | ⊕ ⊕ ○ ○ ○<br>Low      |
| OA v None      | 0.83<br>(0.64 - 1.07)               | ⊕ ⊕ ○ ○ ○<br>Low      | <b>0.31</b><br><b>(0.12 - 0.84)</b> | ⊕ ⊕ ○ ○ ○<br>Low      | <b>0.78</b><br><b>(0.61 - 0.99)</b> | ⊕ ⊕ ○ ○ ○<br>Low      |
| MBP v None *   | 0.85<br>(0.65 - 1.11)               | ⊕ ⊕ ○ ○ ○<br>Low      | 2.02<br>(0.95 - 4.30)               | ⊕ ⊕ ○ ○ ○<br>Low      | 0.94<br>(0.73 - 1.21)               | ⊕ ⊕ ○ ○ ○<br>Low      |

\* Direct and indirect evidence show significant inconsistency. Thus the focus will be on only the direct evidence, which has a greater confidence than the indirect evidence

### Direct evidence

|                |                |                                      |
|----------------|----------------|--------------------------------------|
| MBP-OA v OA:   | Very low       | (risk of bias -1 and imprecision -2) |
| MBP-OA v MBP:  | Moderate       | (risk of bias -1)                    |
| MBP-OA v None: | Very low       | (risk of bias -1 and imprecision -2) |
| OA v MBP:      | Not applicable |                                      |
| OA v None:     | Low            | (risk of bias -1 and imprecision -1) |
| MBP v None:    | Low            | (risk of bias -1 and imprecision -1) |

### Indirect evidence

|                |          |                                      |
|----------------|----------|--------------------------------------|
| MBP-OA v OA:   | Low      | (risk of bias -1 and imprecision -1) |
| MBP-OA v MBP:  | Very Low | (risk of bias -1 and imprecision -2) |
| MBP-OA v None: | Low      | (risk of bias -1 and imprecision -1) |
| OA v MBP:      | Low      | (risk of bias -1 and imprecision -1) |
| OA v None:     | Low      | (risk of bias -1 and imprecision -1) |
| MBP v None:    | Low      | (risk of bias -1 and imprecision -1) |

### Network evidence

If only direct or indirect evidence is available for a given comparison, the network quality rating will be based on that estimate. When, for a particular comparison, both direct and indirect evidence are available, we used the highest of the two quality ratings as the quality rating for the NMA estimate.

**Conclusions anastomotic leakage**

MBP-OA versus OA

|                  |                                                                                                                                                                                                                                        |
|------------------|----------------------------------------------------------------------------------------------------------------------------------------------------------------------------------------------------------------------------------------|
| <b>Low GRADE</b> | The evidence suggests that mechanical bowel preparation combined with oral antibiotics results in little to no difference of anastomotic leakage compared to only oral antibiotics in patients undergoing elective colorectal surgery. |
|------------------|----------------------------------------------------------------------------------------------------------------------------------------------------------------------------------------------------------------------------------------|

MBP-OA versus MBP

|                       |                                                                                                                                                                                                  |
|-----------------------|--------------------------------------------------------------------------------------------------------------------------------------------------------------------------------------------------|
| <b>Moderate GRADE</b> | Mechanical bowel preparation combined with oral antibiotics likely reduces anastomotic leakage compared to only mechanical bowel preparation in patients undergoing elective colorectal surgery. |
|-----------------------|--------------------------------------------------------------------------------------------------------------------------------------------------------------------------------------------------|

MBP-OA versus None

|                  |                                                                                                                                                                                              |
|------------------|----------------------------------------------------------------------------------------------------------------------------------------------------------------------------------------------|
| <b>Low GRADE</b> | The evidence suggests mechanical bowel preparation combined with oral antibiotics reduces anastomotic leakage compared to no preparation in patients undergoing elective colorectal surgery. |
|------------------|----------------------------------------------------------------------------------------------------------------------------------------------------------------------------------------------|

OA versus MBP

|                  |                                                                                                                                                                                                              |
|------------------|--------------------------------------------------------------------------------------------------------------------------------------------------------------------------------------------------------------|
| <b>Low GRADE</b> | The evidence suggests that only oral antibiotics results in little to no difference of anastomotic leakage compared to only mechanical bowel preparation in patients undergoing elective colorectal surgery. |
|------------------|--------------------------------------------------------------------------------------------------------------------------------------------------------------------------------------------------------------|

OA versus None

|                  |                                                                                                                                                                                           |
|------------------|-------------------------------------------------------------------------------------------------------------------------------------------------------------------------------------------|
| <b>Low GRADE</b> | The evidence suggests that only oral antibiotics may result in a slight reduction of anastomotic leakage compared with no preparation in patients undergoing elective colorectal surgery. |
|------------------|-------------------------------------------------------------------------------------------------------------------------------------------------------------------------------------------|

MBP versus None

|                  |                                                                                                                                                                                                  |
|------------------|--------------------------------------------------------------------------------------------------------------------------------------------------------------------------------------------------|
| <b>Low GRADE</b> | The evidence suggests that mechanical bowel preparation results in little to no difference in anastomotic leakage compared to no preparation in patients undergoing elective colorectal surgery. |
|------------------|--------------------------------------------------------------------------------------------------------------------------------------------------------------------------------------------------|

### 7.3. GRADE assessment with certainty levels: Mortality

| Comparison       | Direct evidence        |                     | Indirect evidence      |                     | Network meta-analysis |                     |
|------------------|------------------------|---------------------|------------------------|---------------------|-----------------------|---------------------|
|                  | Relative Risk (95%CI)  | Quality of evidence | Relative Risk (95%CI)  | Quality of evidence | Relative Risk (95%CI) | Quality of evidence |
| MBP-OA<br>v OA   | 1.29<br>(0.34 - 4.85)  | ⊕ ○ ○ ○<br>Very Low | 0.21<br>(0.02 - 2.05)  | ⊕ ○ ○ ○<br>Very Low | 0.82<br>(0.26 - 2.57) | ⊕ ○ ○ ○<br>Very Low |
| MBP-OA<br>v MBP  | 1.00<br>(0.59 - 1.69)  | ⊕ ○ ○ ○<br>Very Low | 0.32<br>(0.03 - 3.57)  | ⊕ ○ ○ ○<br>Very Low | 0.95<br>(0.57 - 1.59) | ⊕ ○ ○ ○<br>Very Low |
| MBP-OA<br>v None | 0.05<br>(0.00 - 27.56) | ⊕ ○ ○ ○<br>Very Low | 1.02<br>(0.52 - 1.98)  | ⊕ ○ ○ ○<br>Very Low | 0.99<br>(0.51 - 1.91) | ⊕ ○ ○ ○<br>Very Low |
| OA<br>v MBP      | -                      | -                   | 1.28<br>(0.39 - 4.25)  | ⊕ ○ ○ ○<br>Very Low | 1.28<br>(0.39 - 4.25) | ⊕ ○ ○ ○<br>Very Low |
| OA<br>v None     | 4.16<br>(0.47 - 36.58) | ⊕ ○ ○ ○<br>Very Low | 0.67<br>(0.15 - 2.99)  | ⊕ ○ ○ ○<br>Very Low | 1.21<br>(0.35 - 4.12) | ⊕ ○ ○ ○<br>Very Low |
| MBP<br>v None    | 0.90<br>(0.58 - 1.42)  | ⊕ ○ ○ ○<br>Very Low | 2.81<br>(0.28 - 31.53) | ⊕ ○ ○ ○<br>Very Low | 0.94<br>(0.60 - 1.46) | ⊕ ○ ○ ○<br>Very Low |

#### Direct evidence

|                |                |                                      |
|----------------|----------------|--------------------------------------|
| MBP v MBP-OA:  | Very Low       | (risk of bias -1 and imprecision -2) |
| MBP v None:    | Very Low       | (risk of bias -1 and imprecision -2) |
| MBP v OA:      | Not applicable |                                      |
| MBP-OA v None: | Very low       | (risk of bias -1 and imprecision -2) |
| MBP-OA v OA:   | Very low       | (risk of bias -1 and imprecision -2) |
| OA v None:     | Very Low       | (risk of bias -1 and imprecision -2) |

#### Indirect evidence

|                |          |                                      |
|----------------|----------|--------------------------------------|
| MBP-OA v OA:   | Very Low | (risk of bias -1 and imprecision -2) |
| MBP-OA v MBP:  | Very Low | (risk of bias -1 and imprecision -2) |
| MBP-OA v None: | Very Low | (risk of bias -1 and imprecision -2) |
| OA v MBP:      | Very Low | (risk of bias -1 and imprecision -2) |
| OA v None:     | Very Low | (risk of bias -1 and imprecision -2) |
| MBP v None:    | Very Low | (risk of bias -1 and imprecision -2) |

#### Network evidence

If only direct or indirect evidence is available for a given comparison, the network quality rating will be based on that estimate. When, for a particular comparison, both direct and indirect evidence are available, we used the highest of the two quality ratings as the quality rating for the NMA estimate.

## Conclusions mortality

MBP-OA versus OA

|                       |                                                                                                                                                                                                                     |
|-----------------------|---------------------------------------------------------------------------------------------------------------------------------------------------------------------------------------------------------------------|
| <b>Very low GRADE</b> | The evidence is very uncertain about the effect of mechanical bowel preparation combined with oral antibiotics on mortality compared with only oral antibiotics in patients undergoing elective colorectal surgery. |
|-----------------------|---------------------------------------------------------------------------------------------------------------------------------------------------------------------------------------------------------------------|

MBP-OA versus MBP

|                       |                                                                                                                                                                                                                               |
|-----------------------|-------------------------------------------------------------------------------------------------------------------------------------------------------------------------------------------------------------------------------|
| <b>Very low GRADE</b> | The evidence is very uncertain about the effect of mechanical bowel preparation combined with oral antibiotics on mortality compared to only mechanical bowel preparation in patients undergoing elective colorectal surgery. |
|-----------------------|-------------------------------------------------------------------------------------------------------------------------------------------------------------------------------------------------------------------------------|

MBP-OA versus None

|                       |                                                                                                                                                                                                                  |
|-----------------------|------------------------------------------------------------------------------------------------------------------------------------------------------------------------------------------------------------------|
| <b>Very Low GRADE</b> | The evidence is very uncertain about the effect of mechanical bowel preparation combined with oral antibiotics on mortality compared to no bowel preparation in patients undergoing elective colorectal surgery. |
|-----------------------|------------------------------------------------------------------------------------------------------------------------------------------------------------------------------------------------------------------|

OA versus MBP

|                       |                                                                                                                                                                                    |
|-----------------------|------------------------------------------------------------------------------------------------------------------------------------------------------------------------------------|
| <b>Very low GRADE</b> | The evidence is very uncertain about the effect of only oral antibiotics on mortality compared to mechanical bowel preparation in patients undergoing elective colorectal surgery. |
|-----------------------|------------------------------------------------------------------------------------------------------------------------------------------------------------------------------------|

OA versus None

|                       |                                                                                                                                                                      |
|-----------------------|----------------------------------------------------------------------------------------------------------------------------------------------------------------------|
| <b>Very low GRADE</b> | The evidence is very uncertain about the effect of only oral antibiotics on mortality compared to no preparation in patients undergoing elective colorectal surgery. |
|-----------------------|----------------------------------------------------------------------------------------------------------------------------------------------------------------------|

MBP versus None

|                       |                                                                                                                                                                                |
|-----------------------|--------------------------------------------------------------------------------------------------------------------------------------------------------------------------------|
| <b>Very Low GRADE</b> | The evidence is very uncertain about the effect of mechanical bowel preparation on mortality compared to no preparation among patients undergoing elective colorectal surgery. |
|-----------------------|--------------------------------------------------------------------------------------------------------------------------------------------------------------------------------|
